# Supplementary material for: Reaction, Reactivity and Behaviour of α-Chloroacetamides in the Synthesis of Acrylamide Derivatives
Source: Research Square preprint supplement (doi:10.21203/rs.3.rs-3853536/v1), 2024-01-25
Supplement: Supplementary file 1 [file 2d8d8e85fdb999958d1d55e1.docx]

Reaction α-chloroacetamides (**1a-e**) with sodium isopropoxide in the corresponding alcohol and carbon disulphide to give 3,6-bis-(dimercaptomethylene)-piperazine-2,5-diones (**2a-e**) as we expected. But the reaction proceeds by different way in which the dithiol of ether derivatives (**5a-e**)

Scheme 1**.**

Scheme 2**.**

**scheme 3**

The postulated mechanism for this reaction is as shown in the following scheme **4**
