# Supplementary figures and images for: Reaction, Reactivity and Behaviour of α-Chloroacetamides in the Synthesis of Acrylamide Derivatives
Source: Research Square preprint supplement (doi:10.21203/rs.3.rs-3853536/v1), 2024-01-25

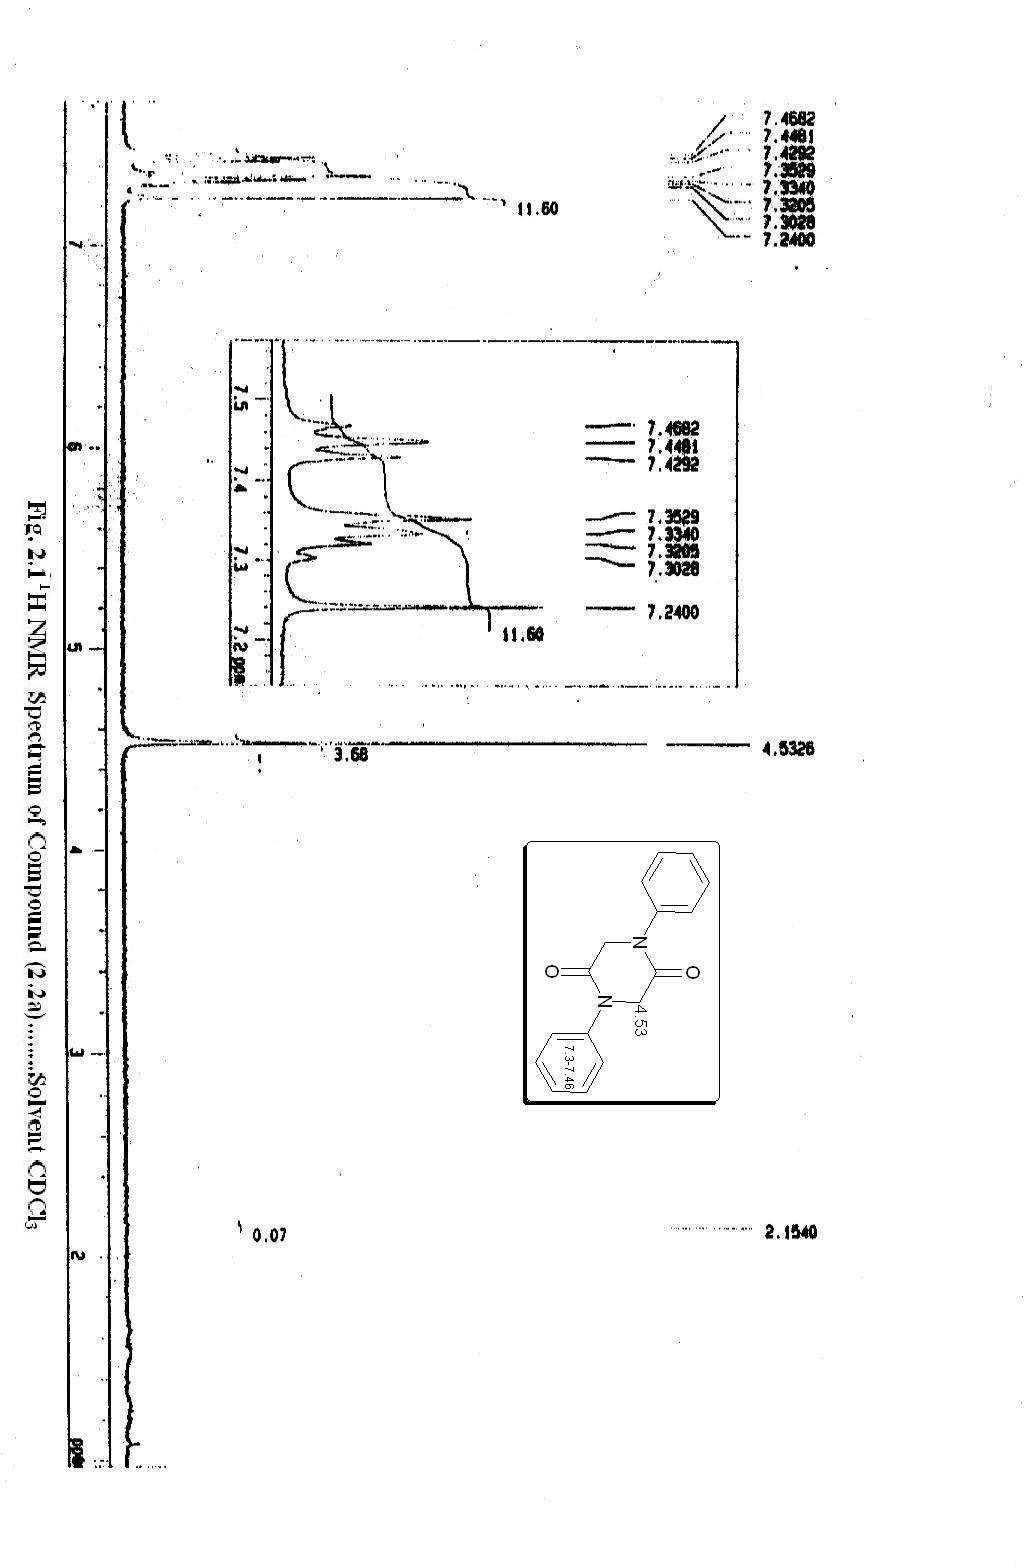


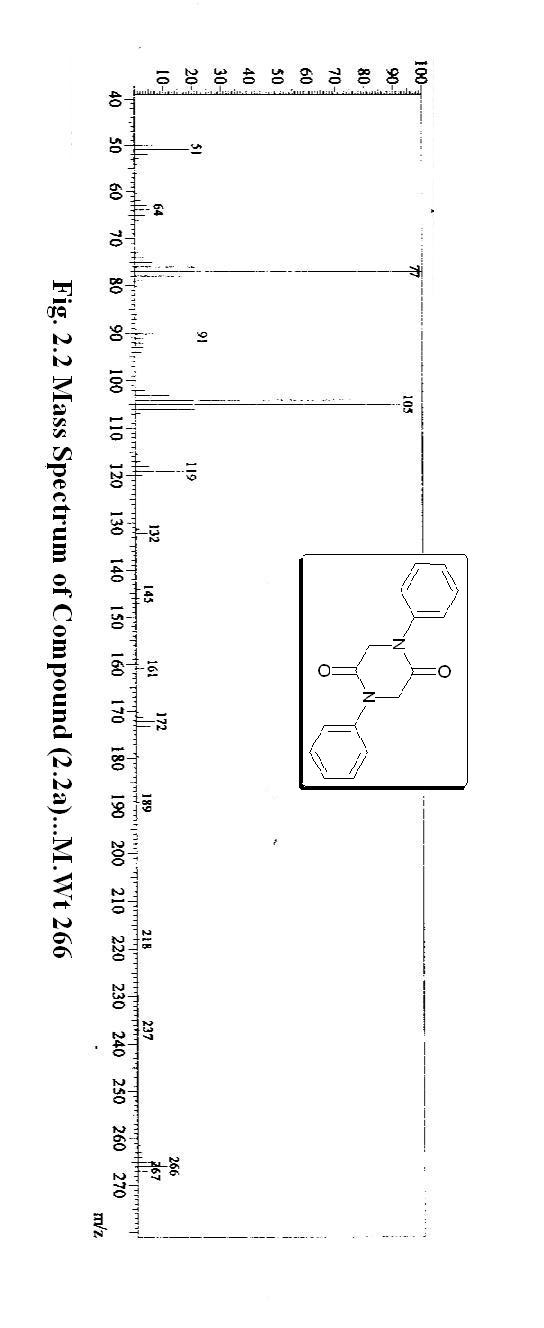


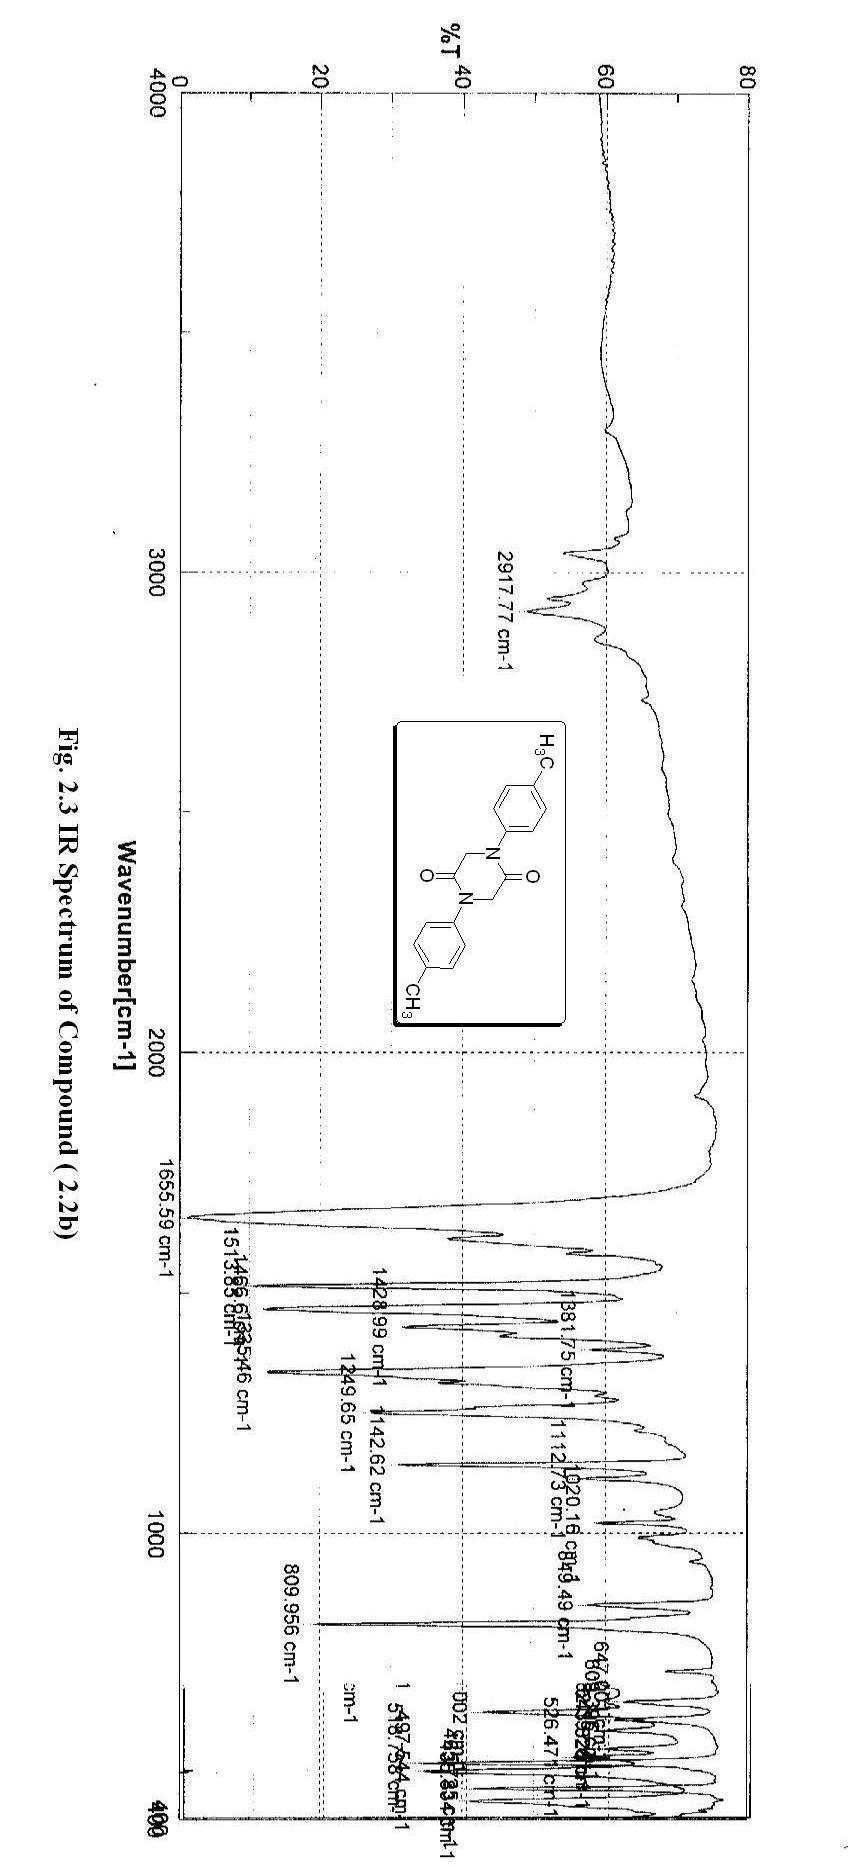


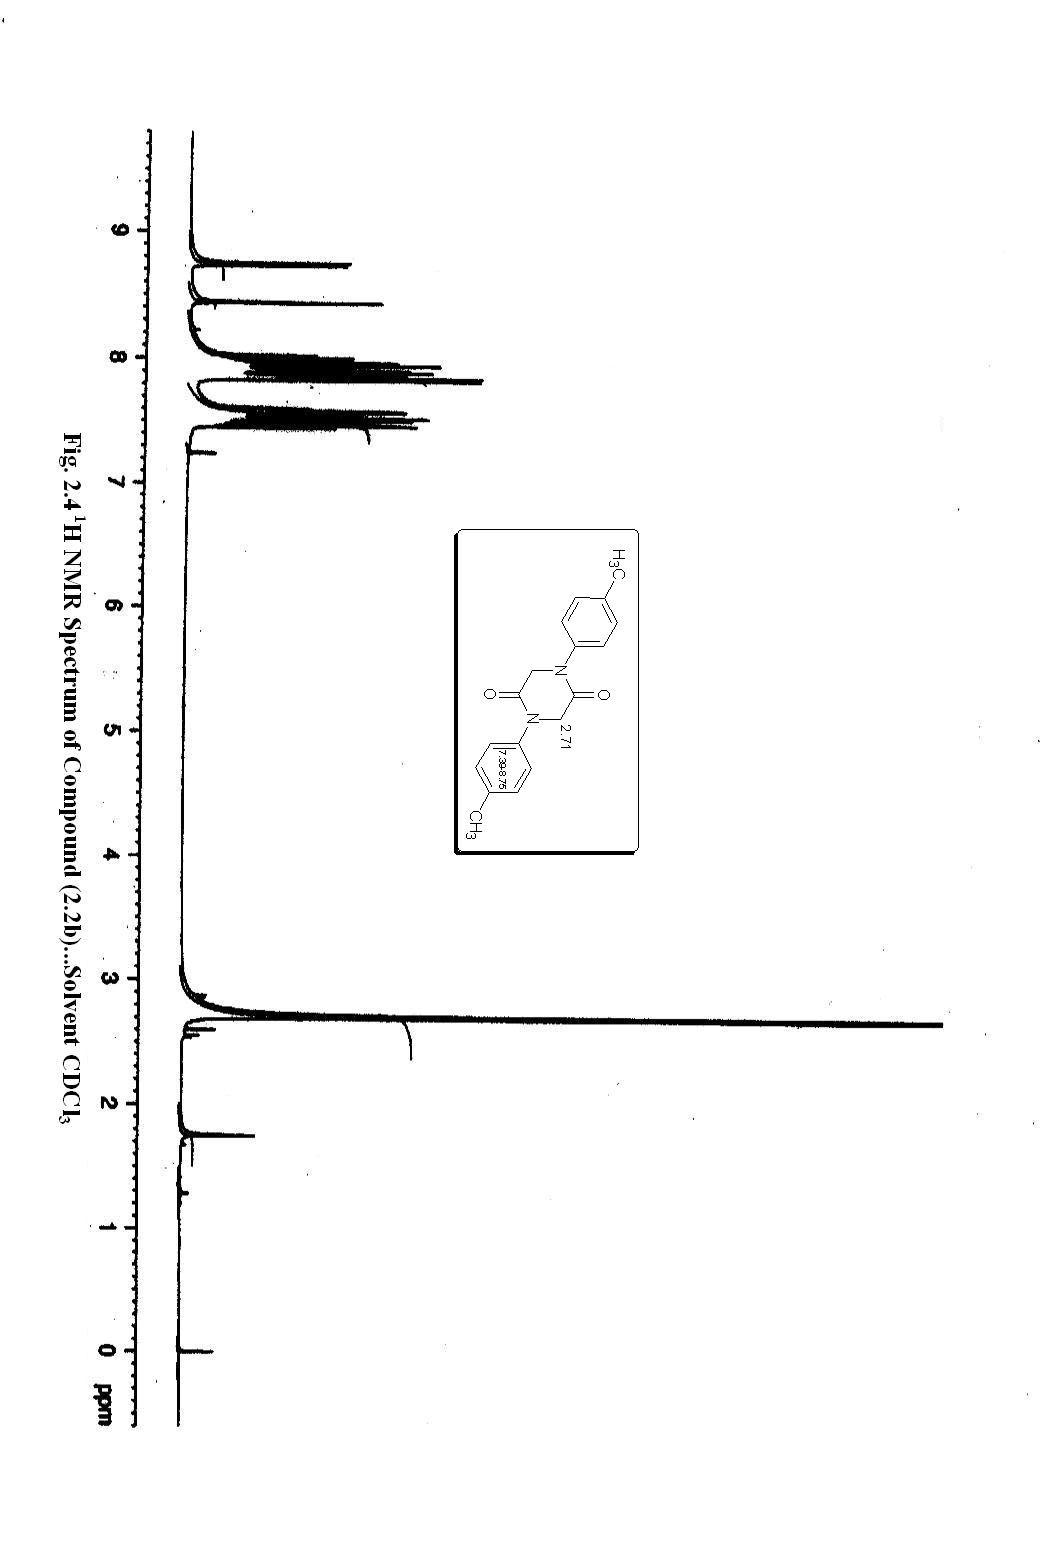


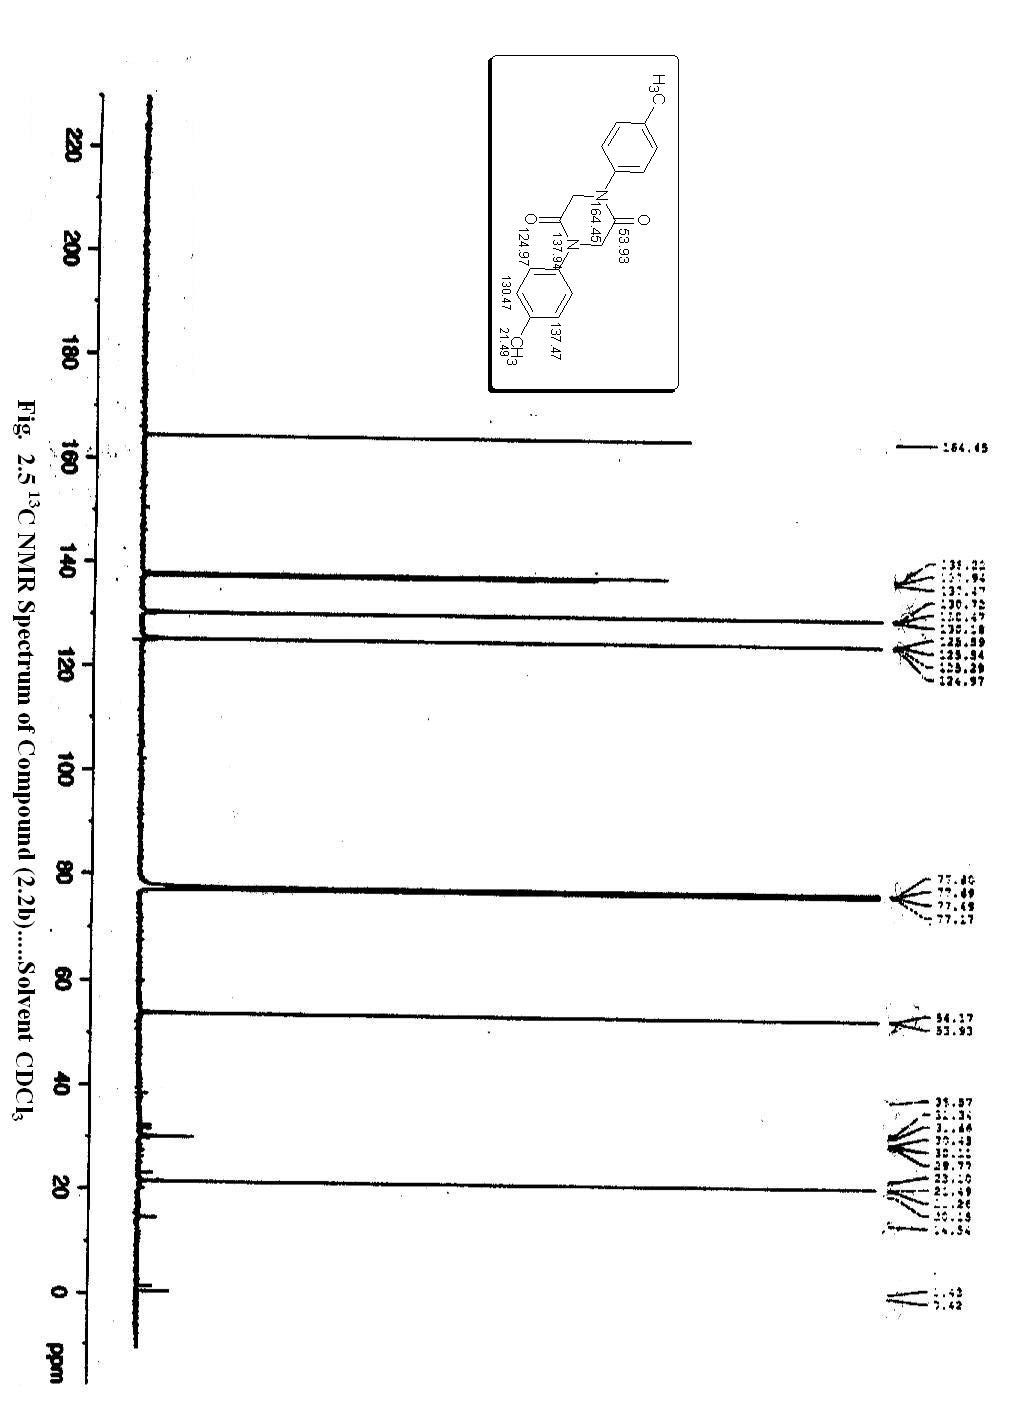


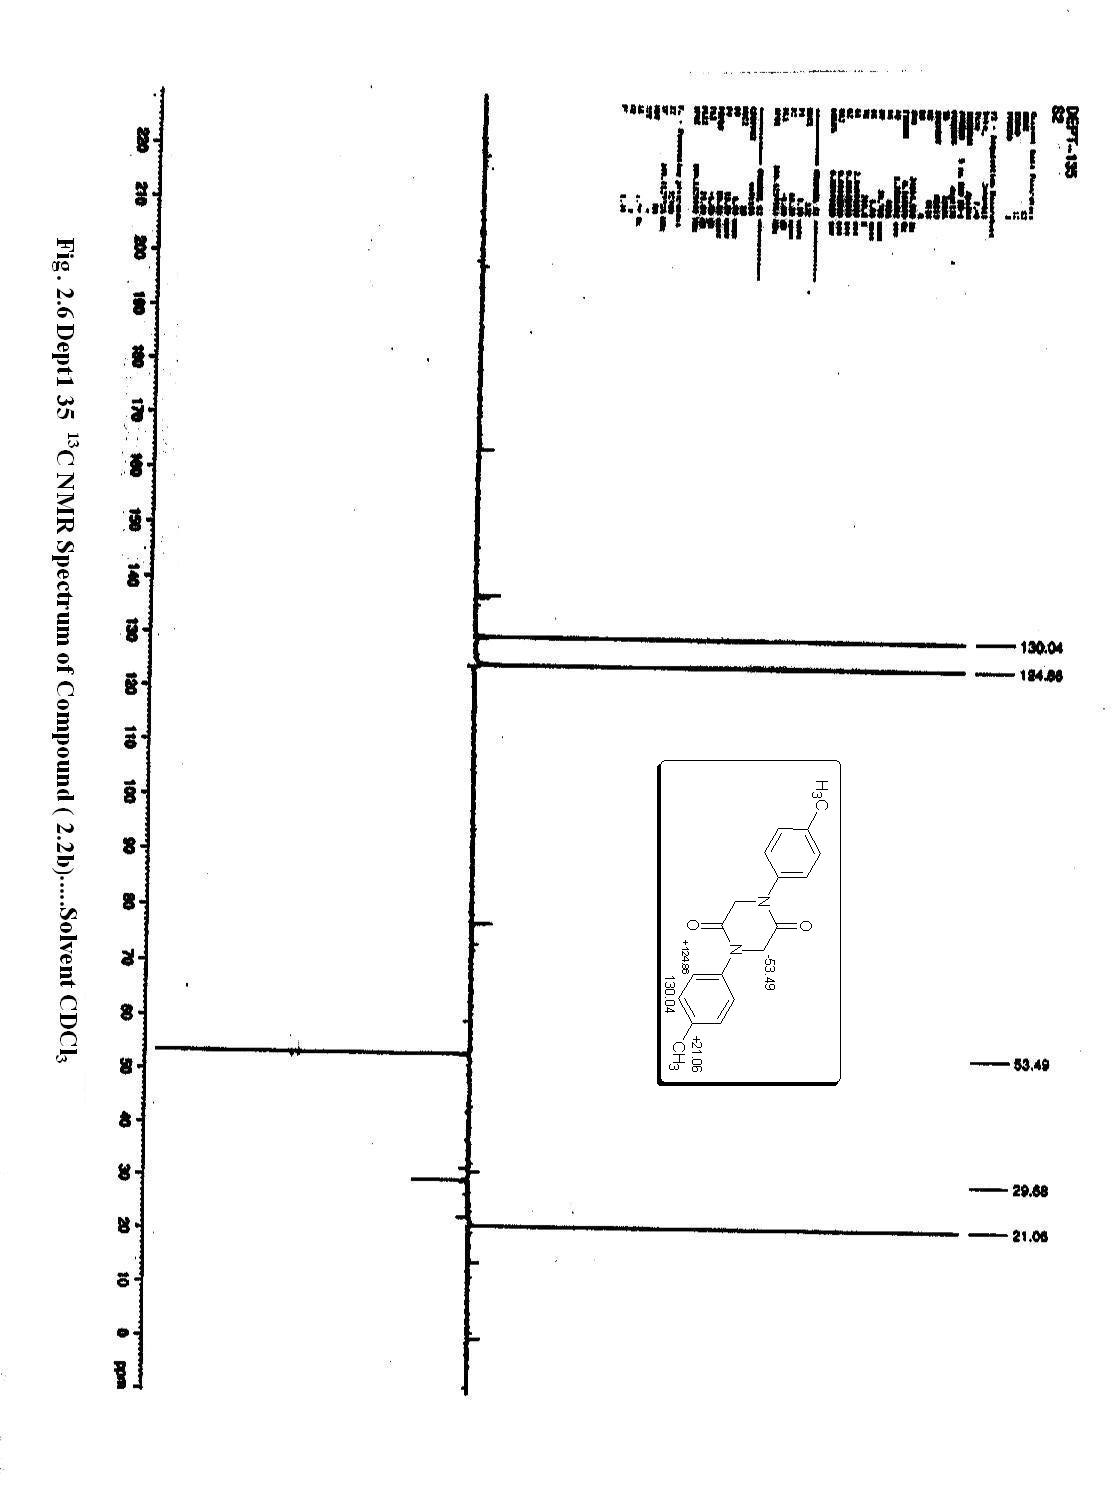


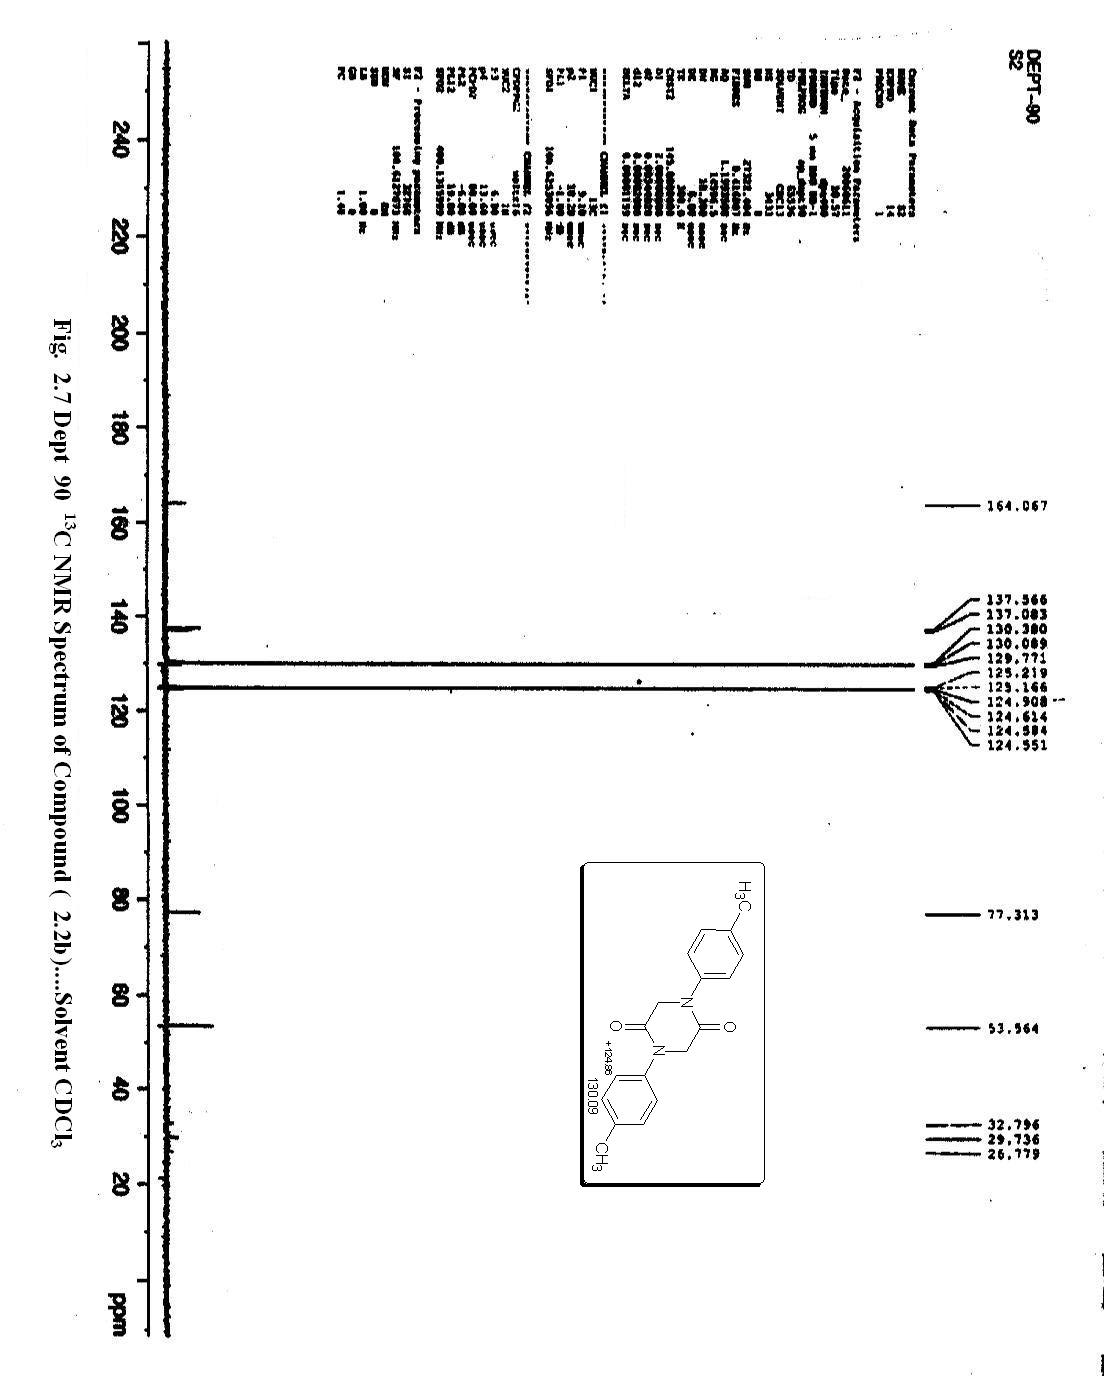


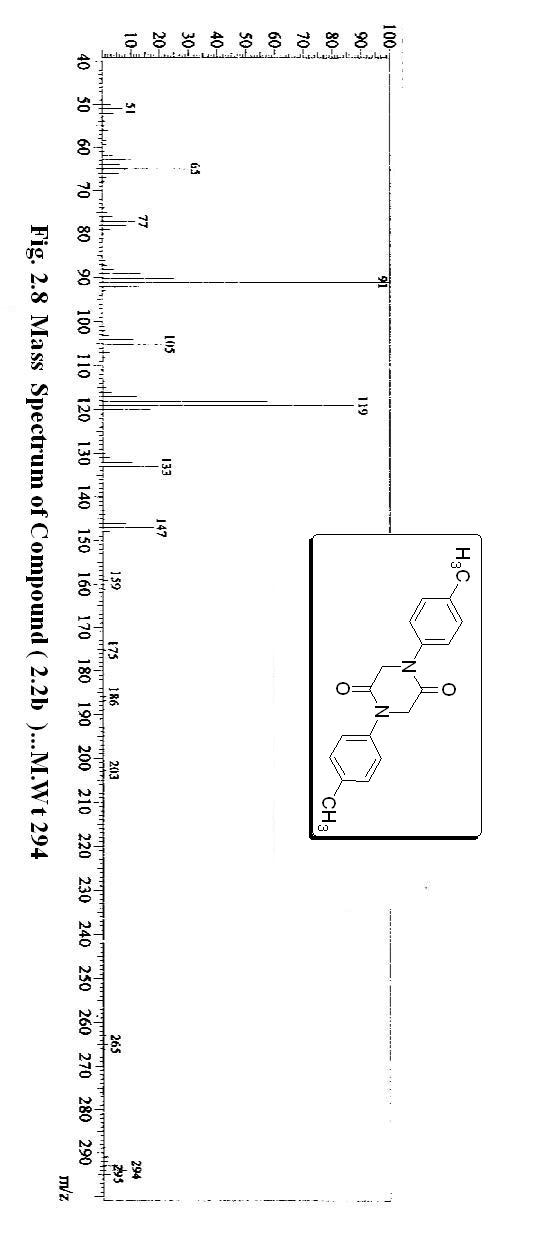


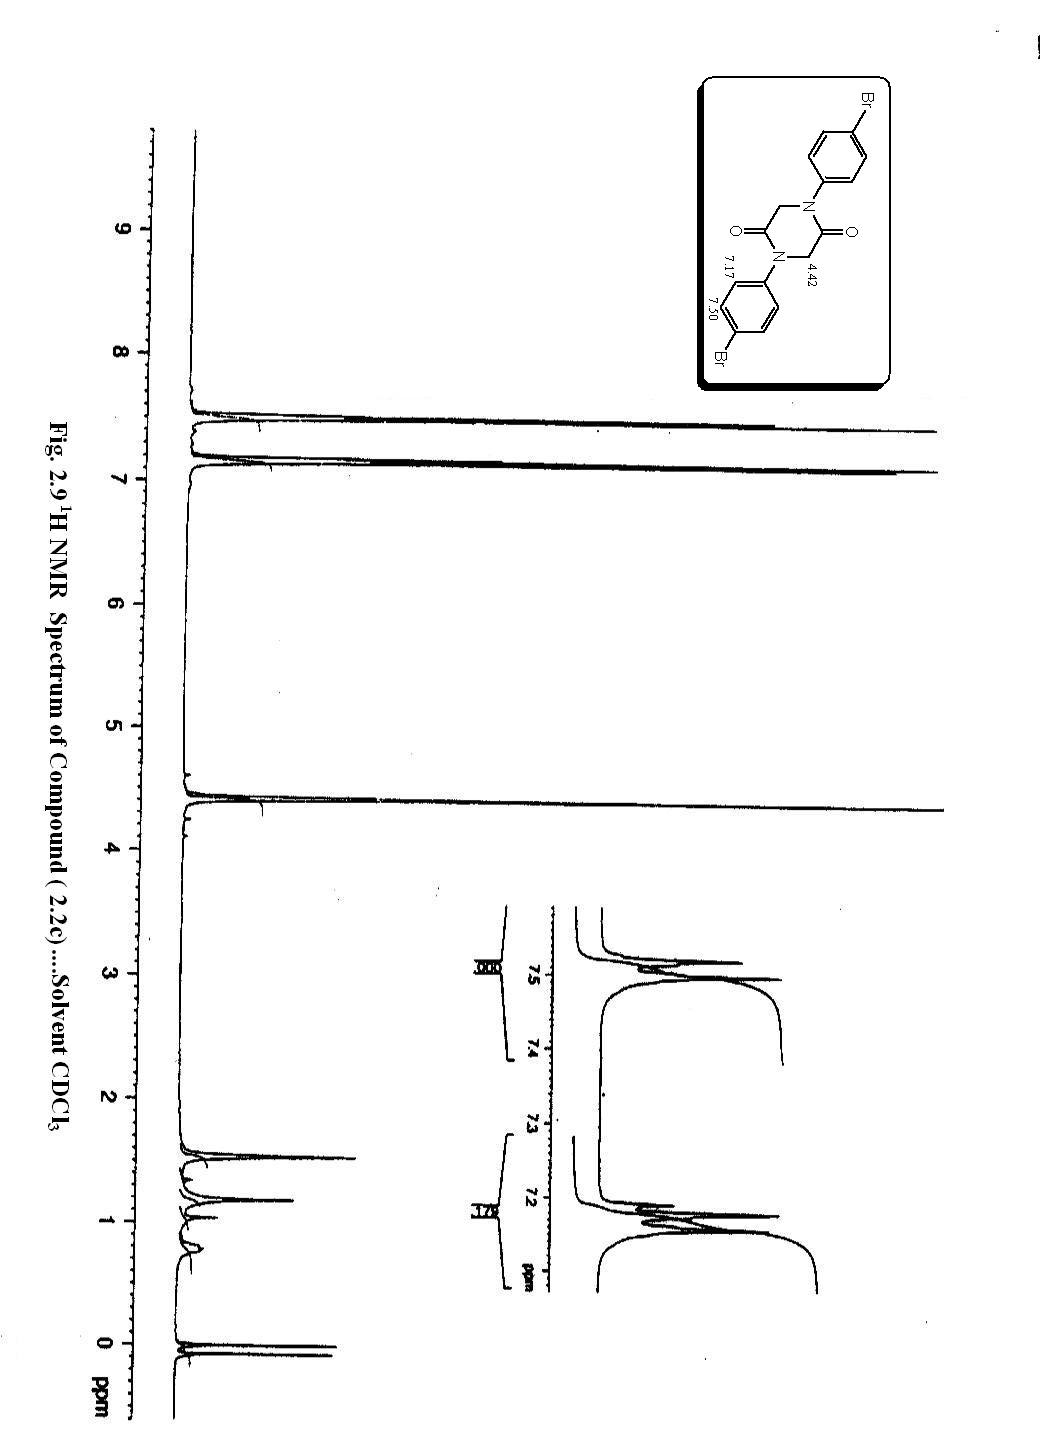


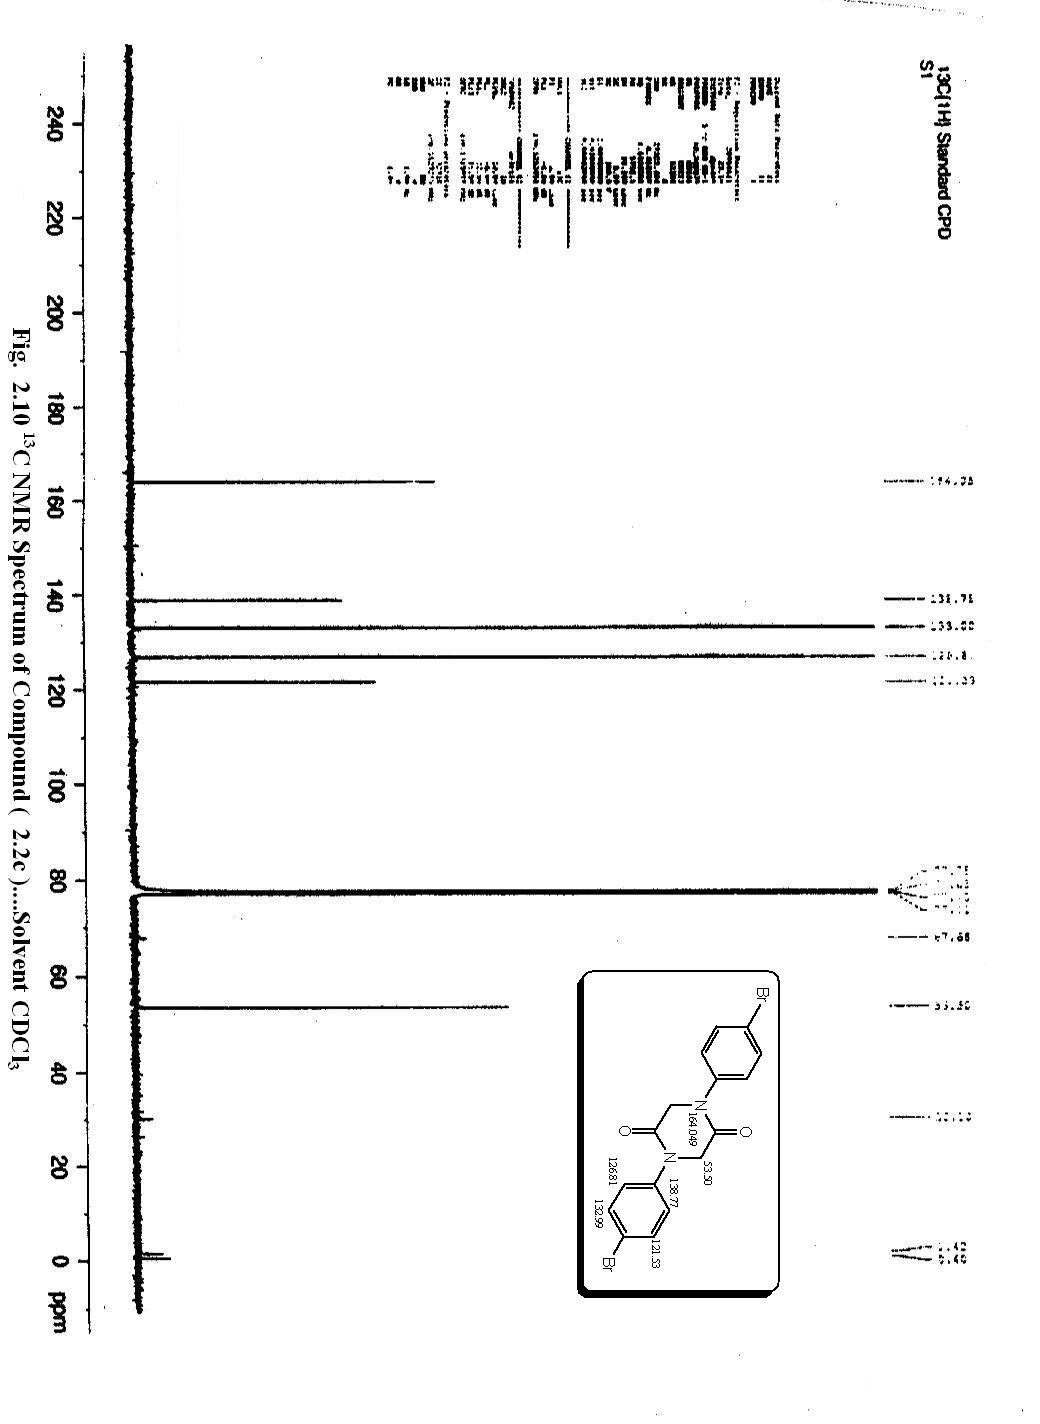


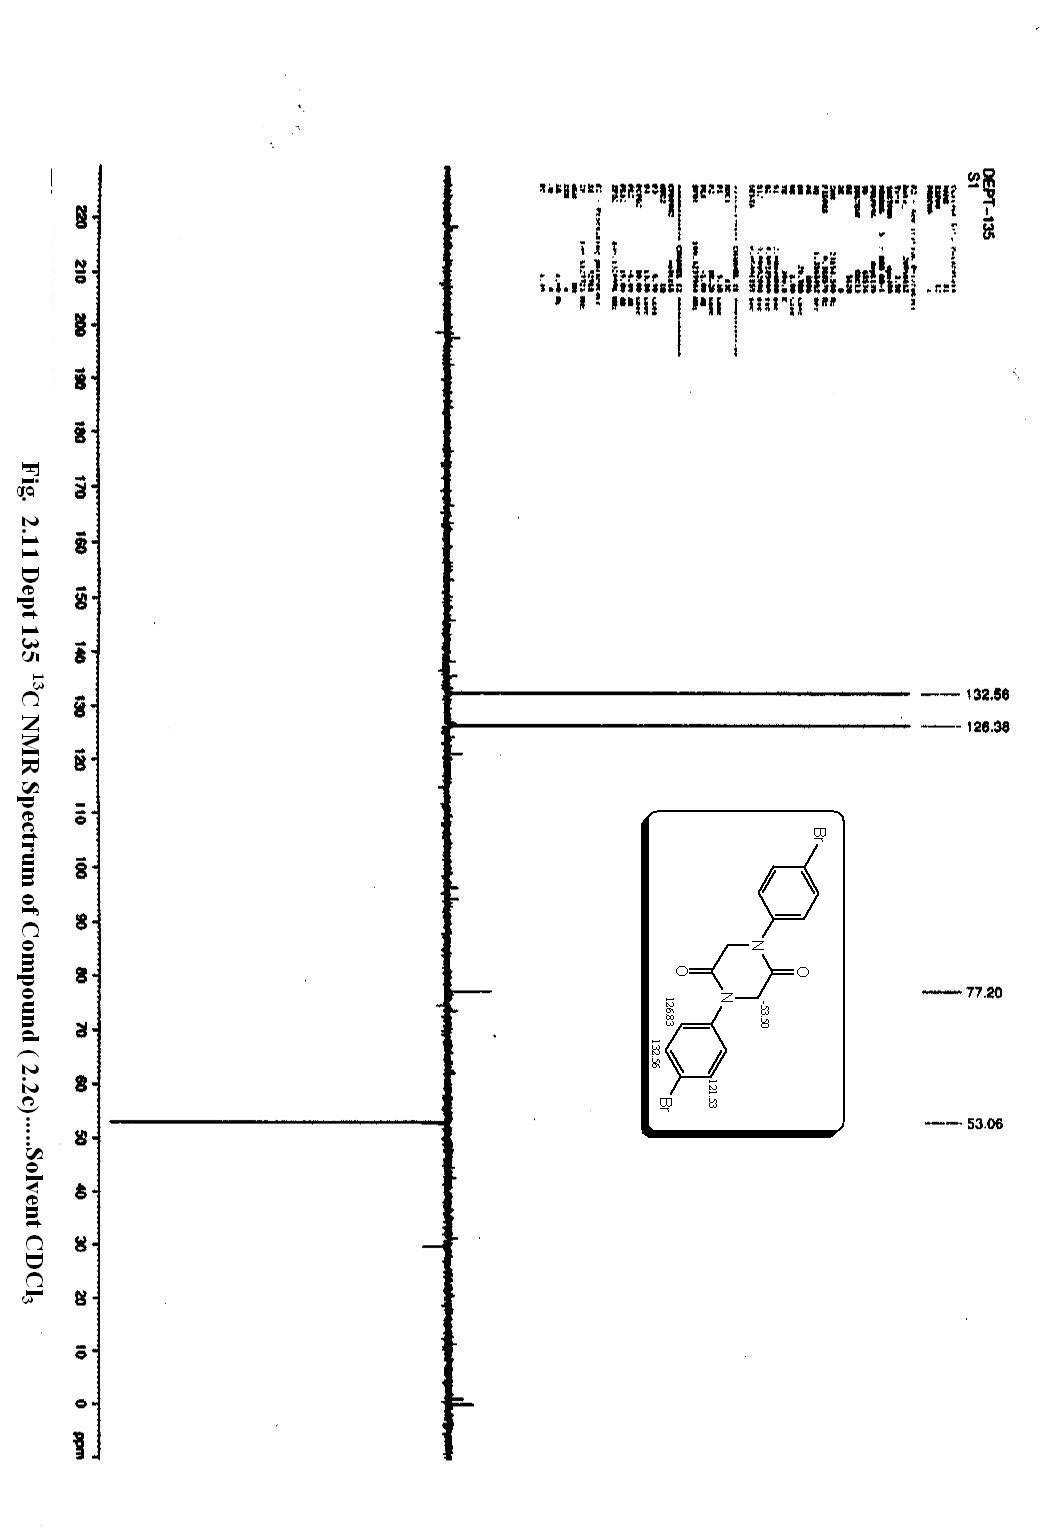


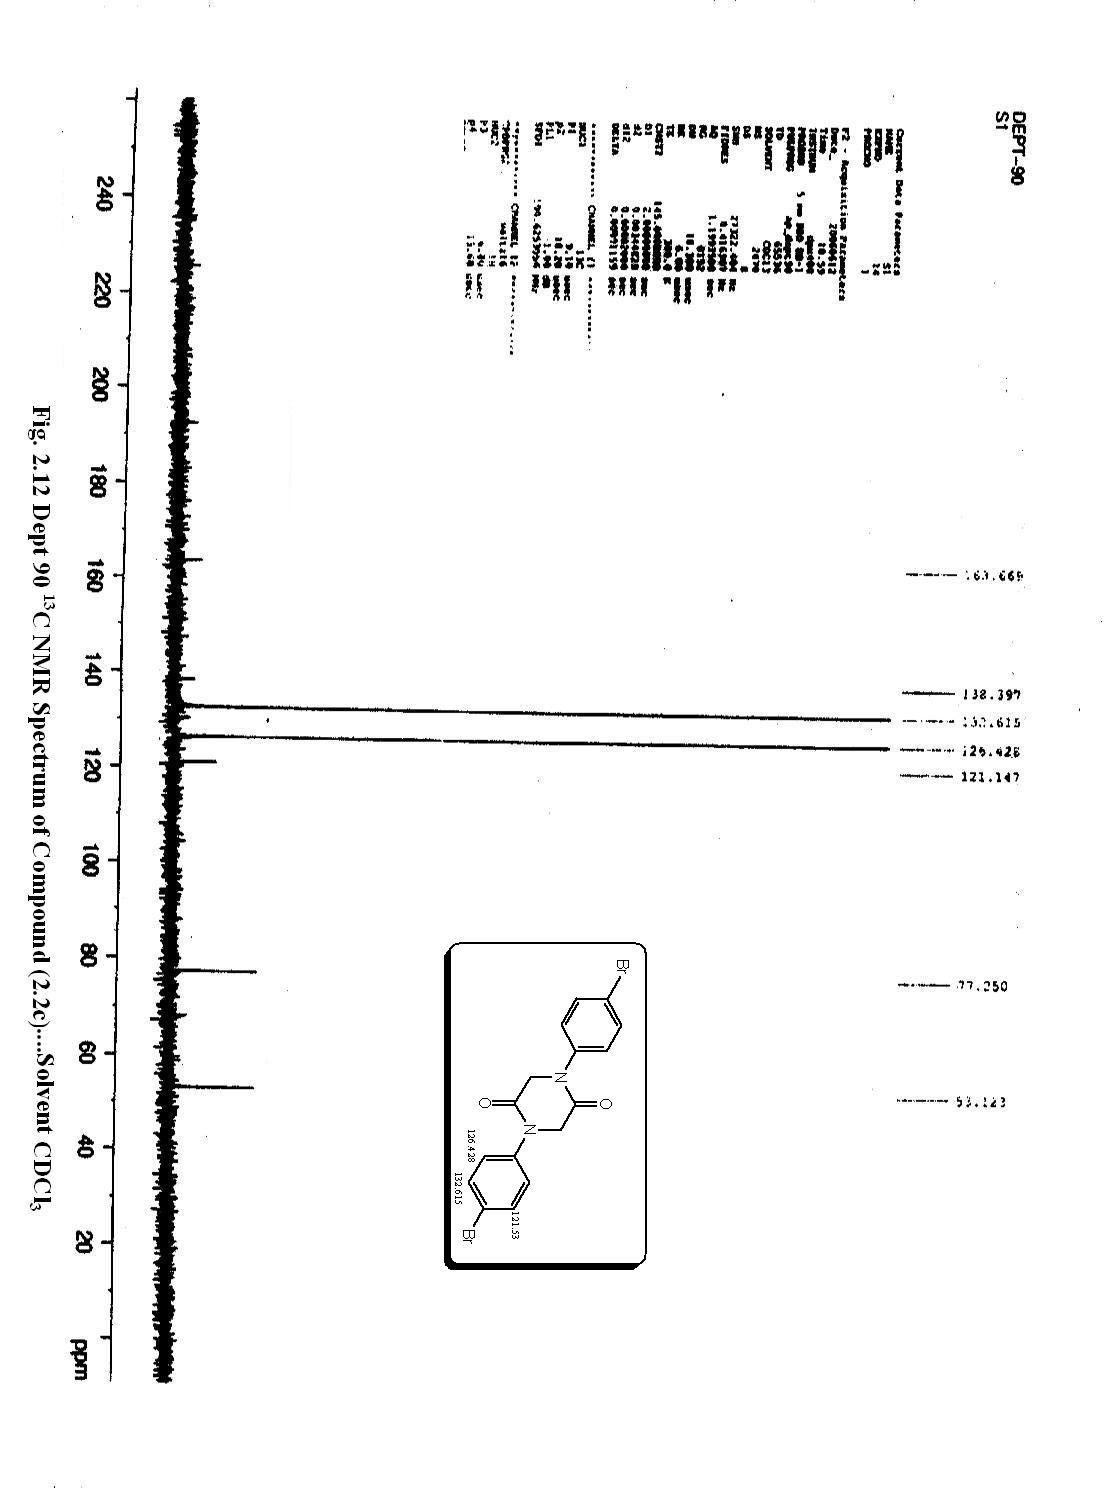


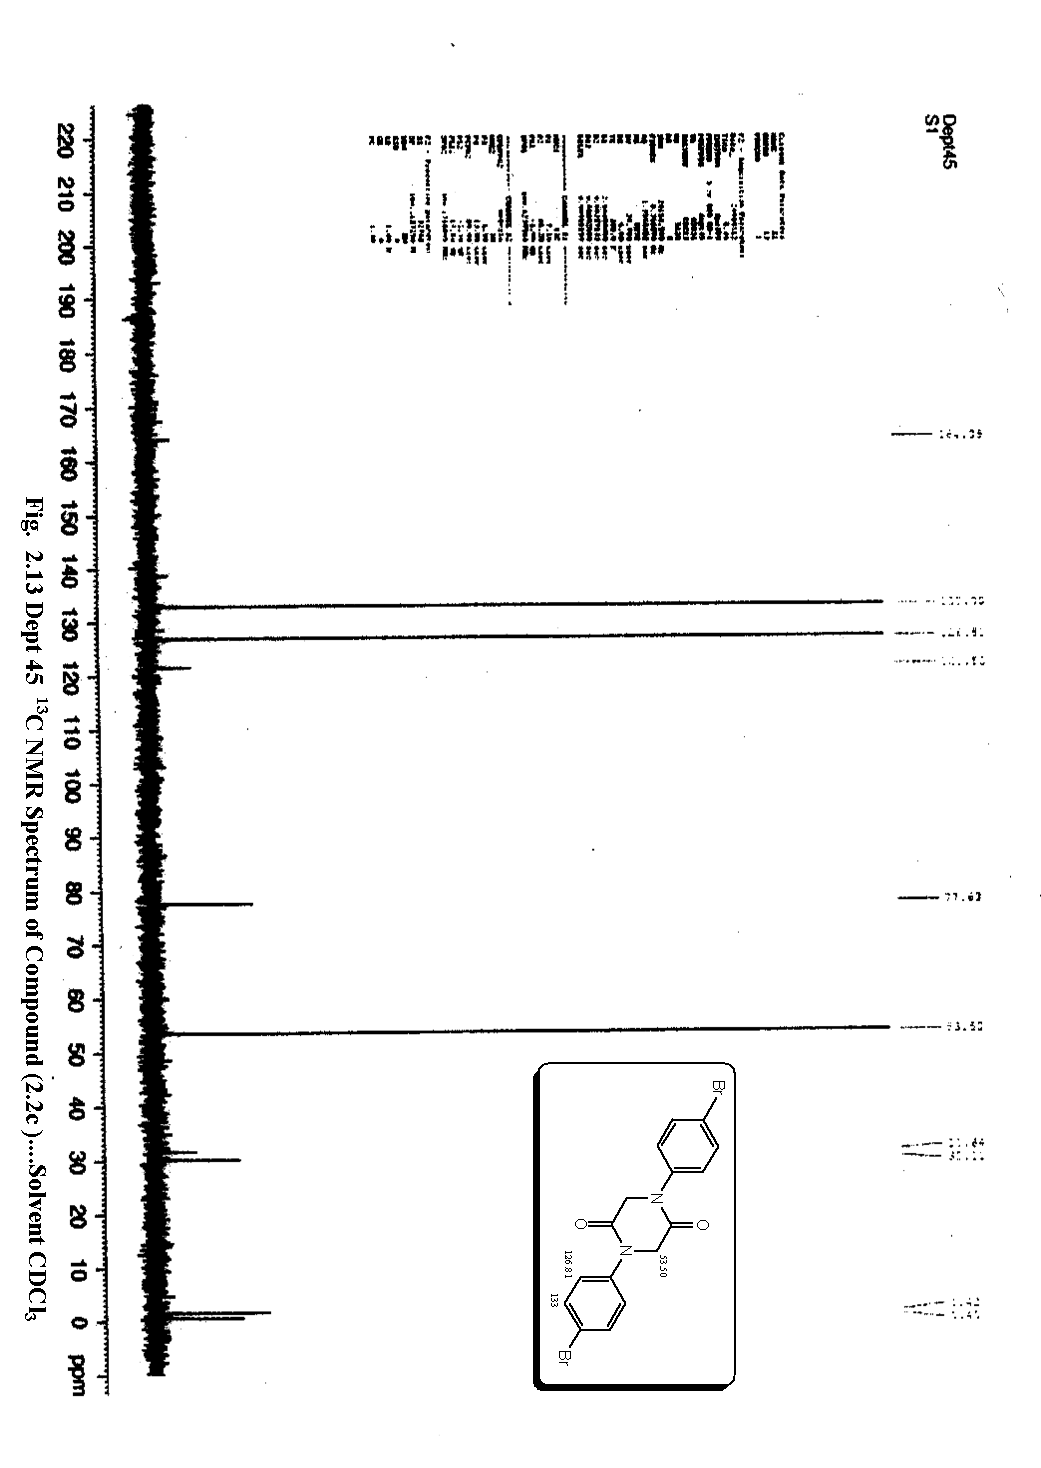


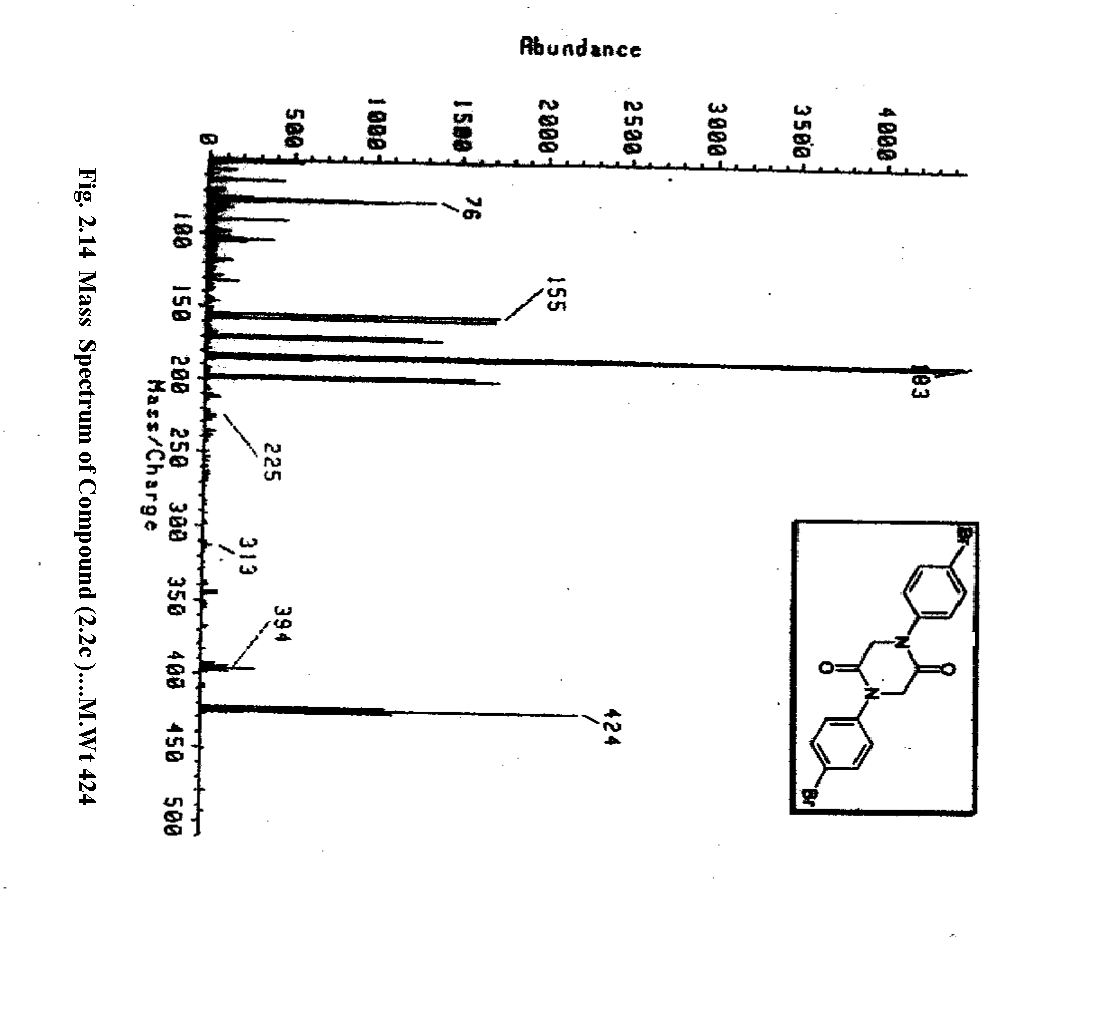


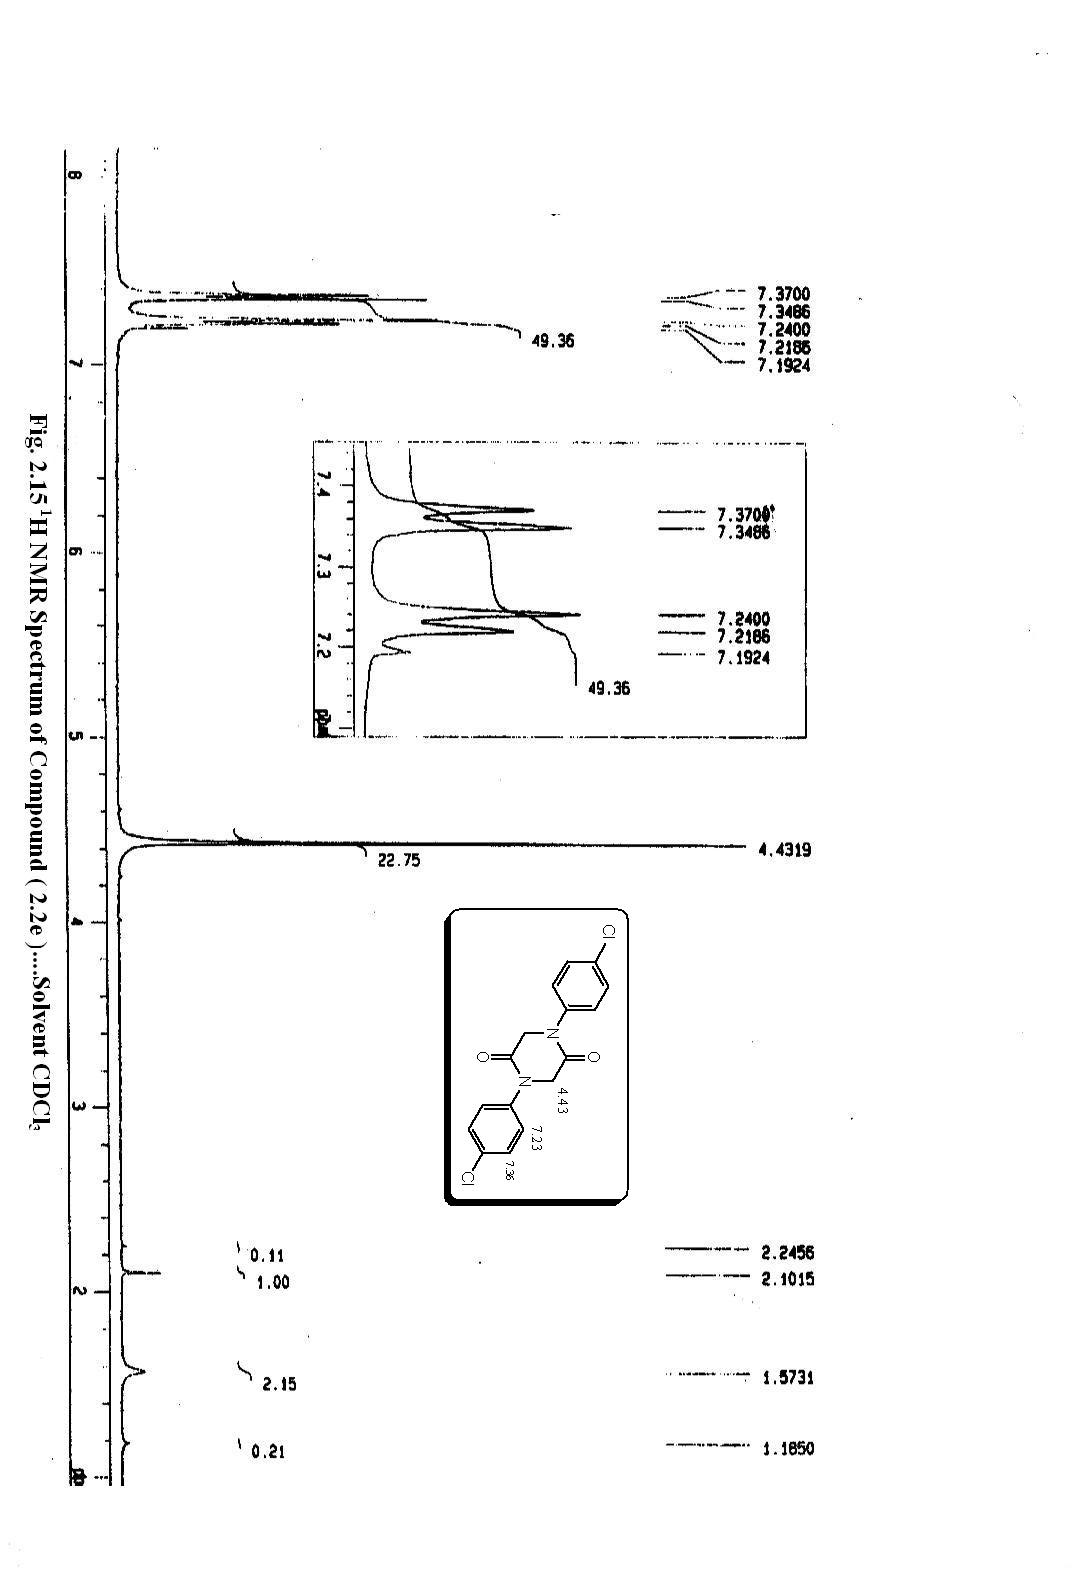


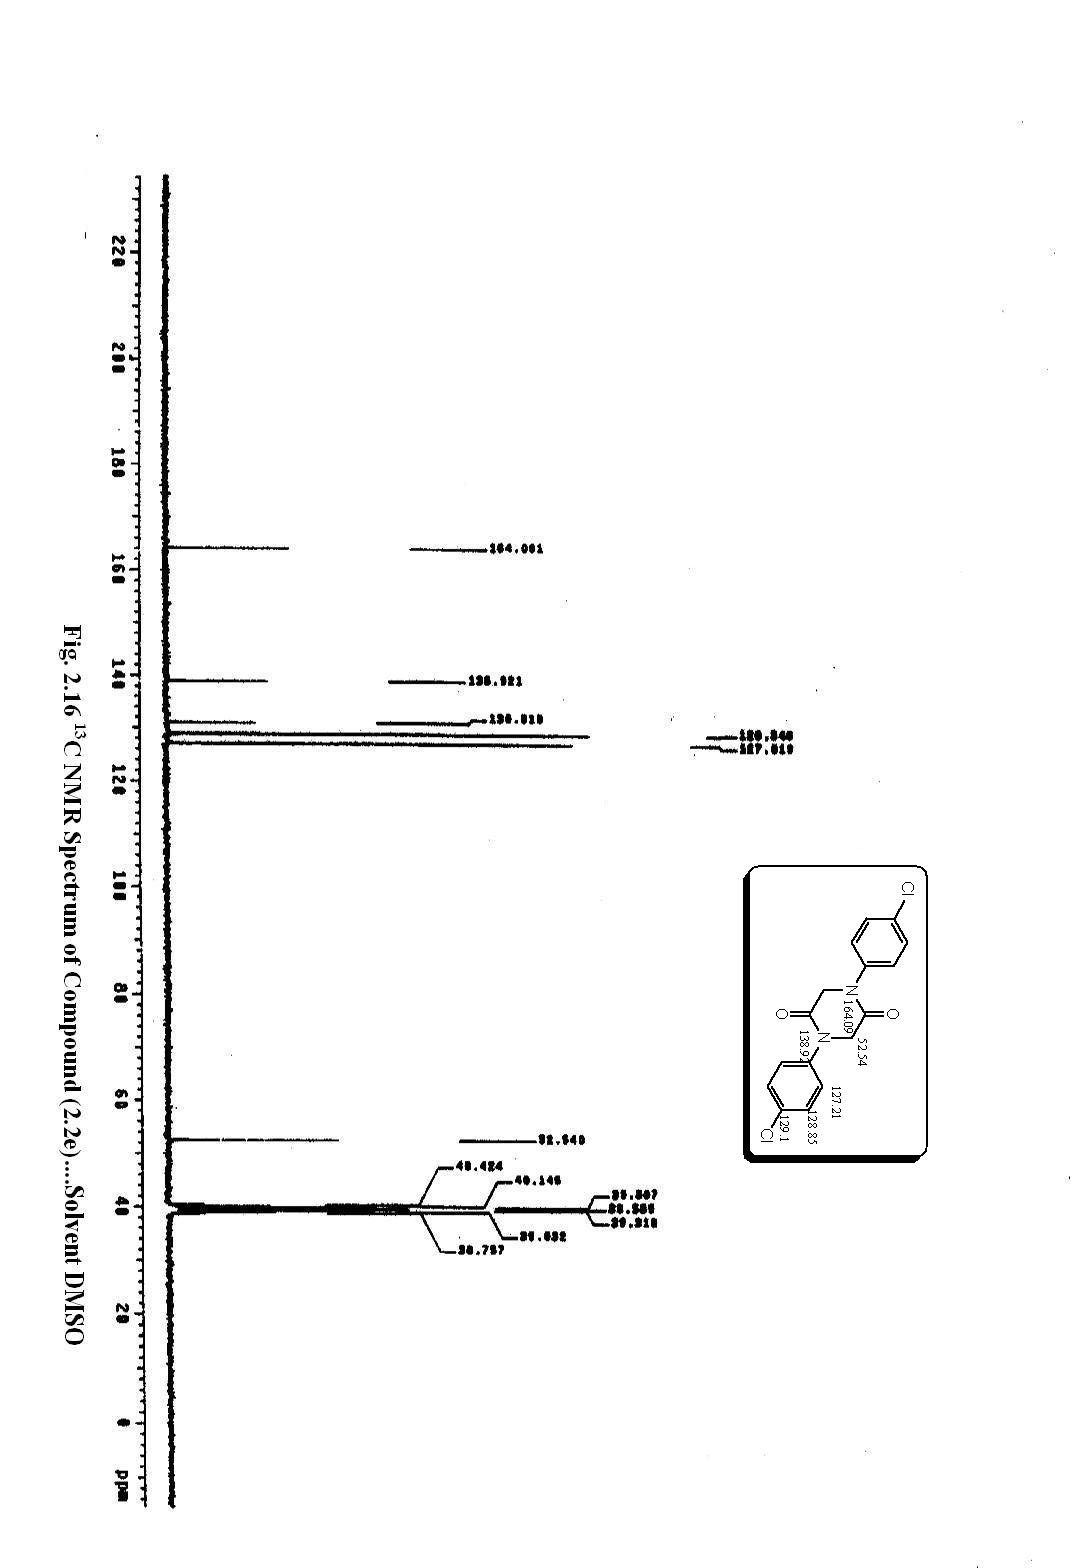


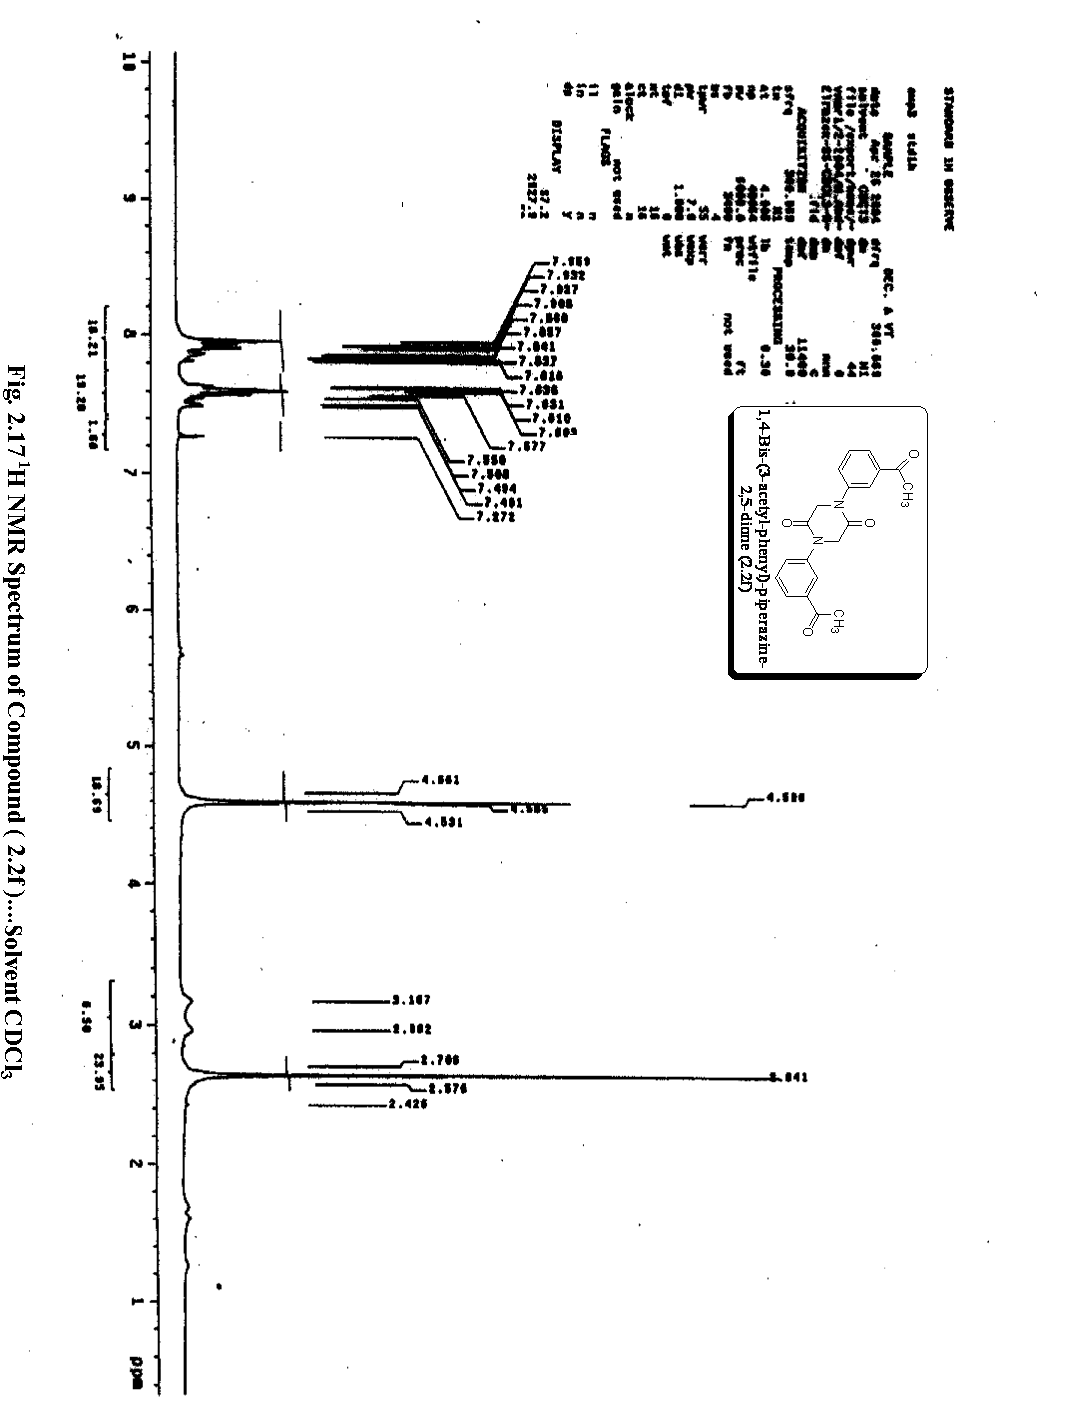


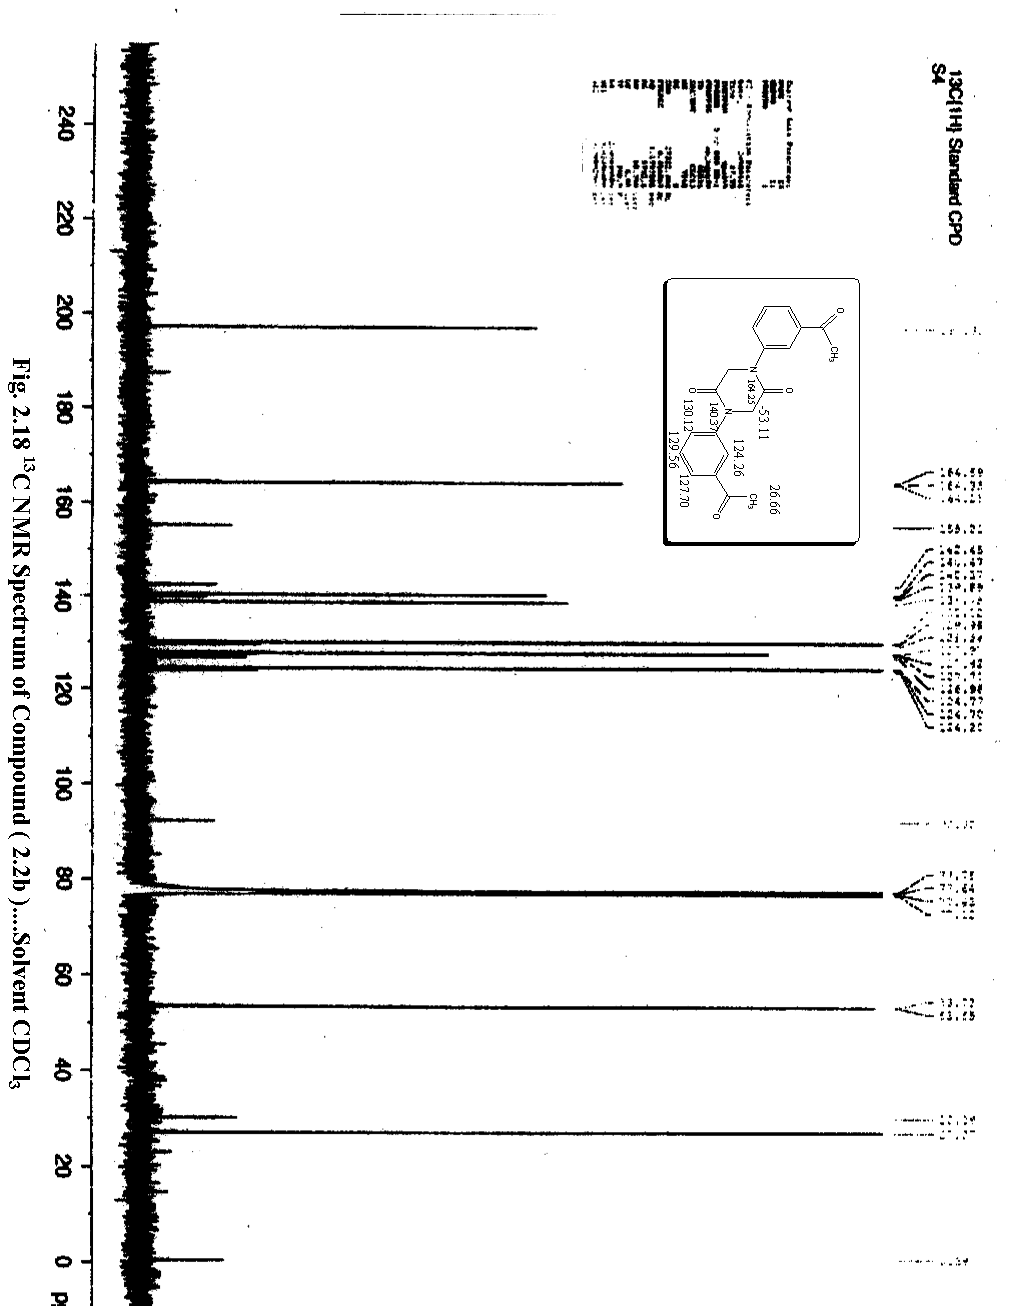


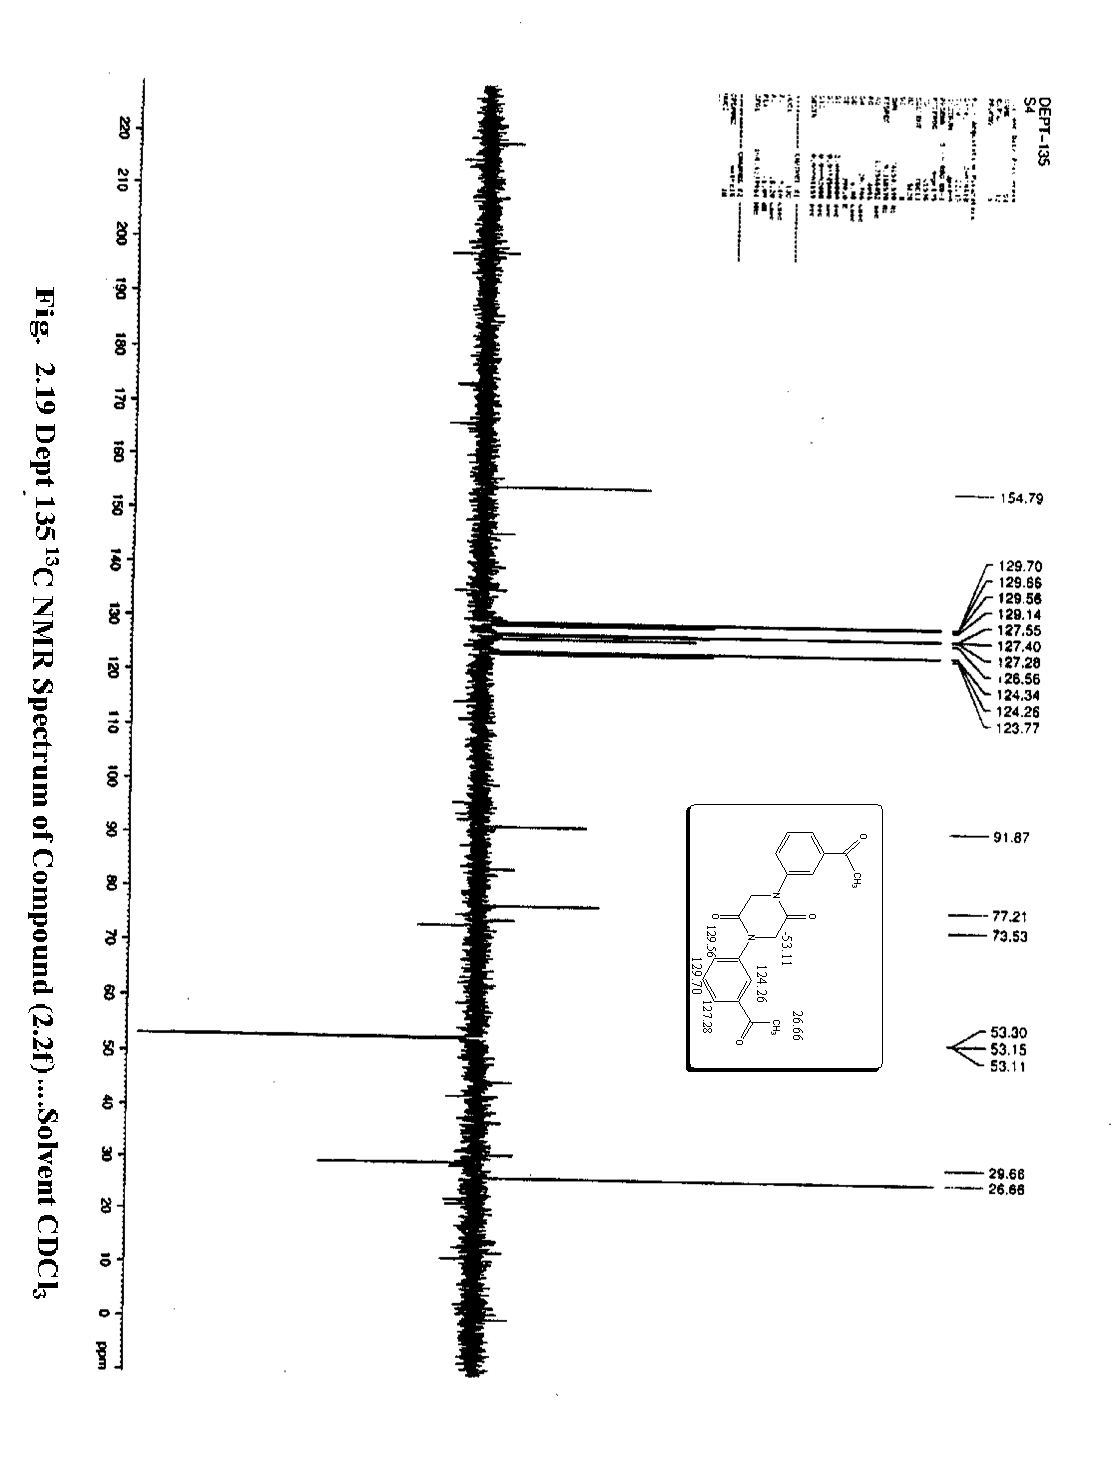


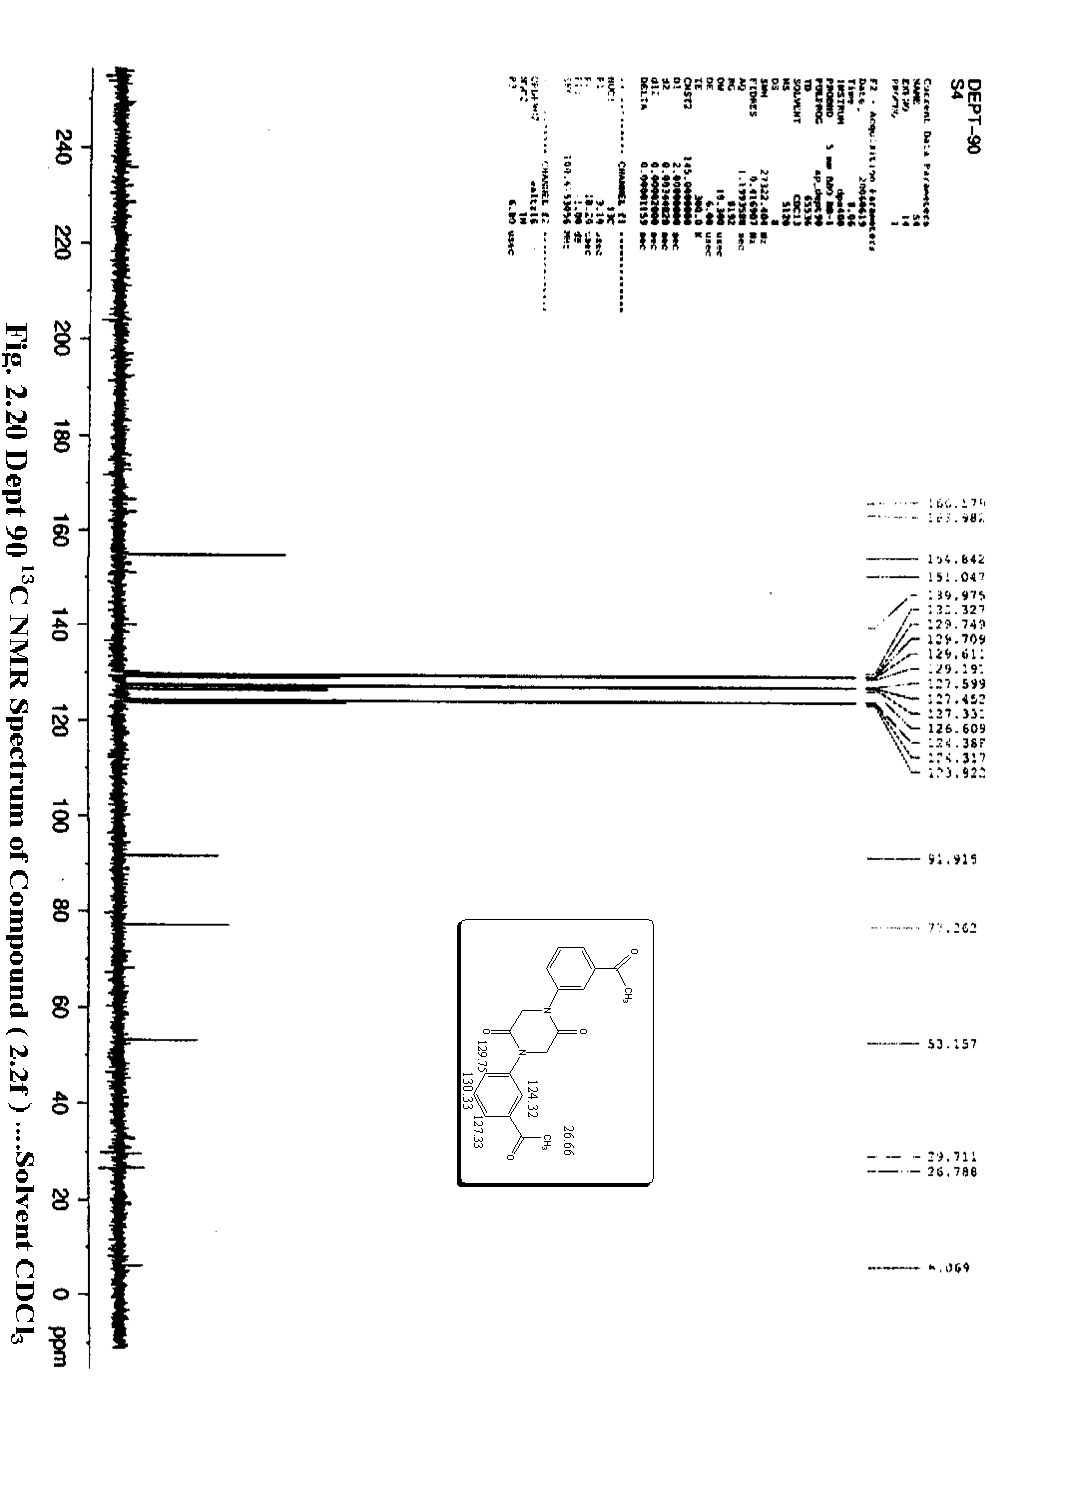


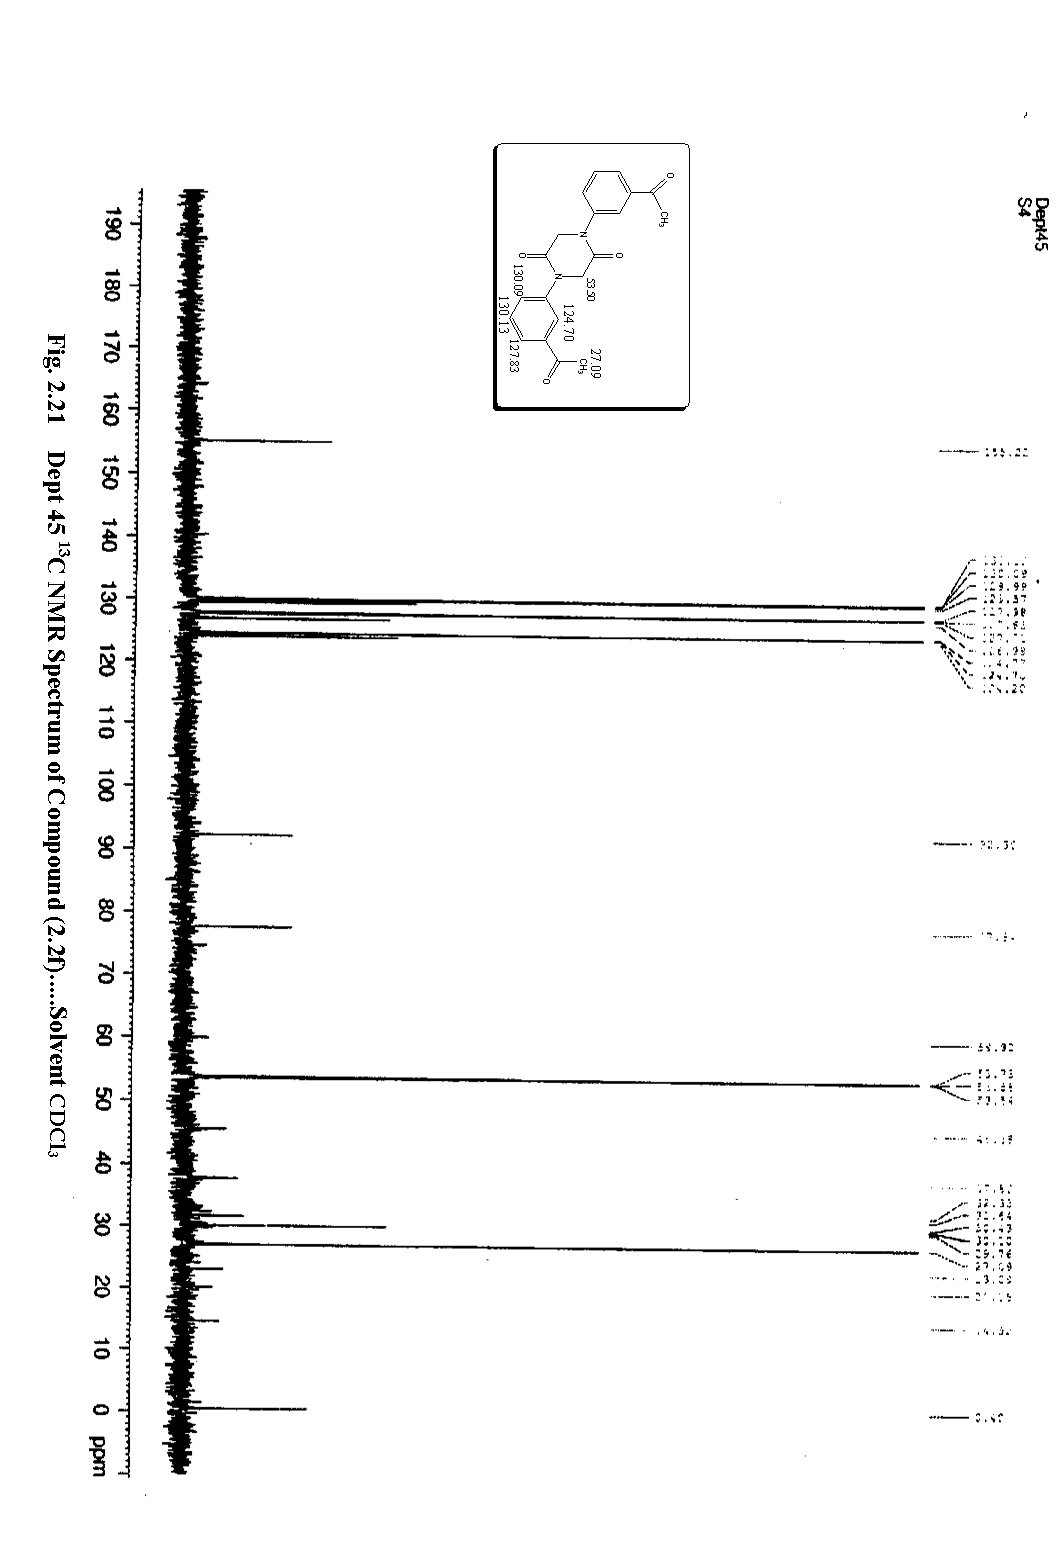


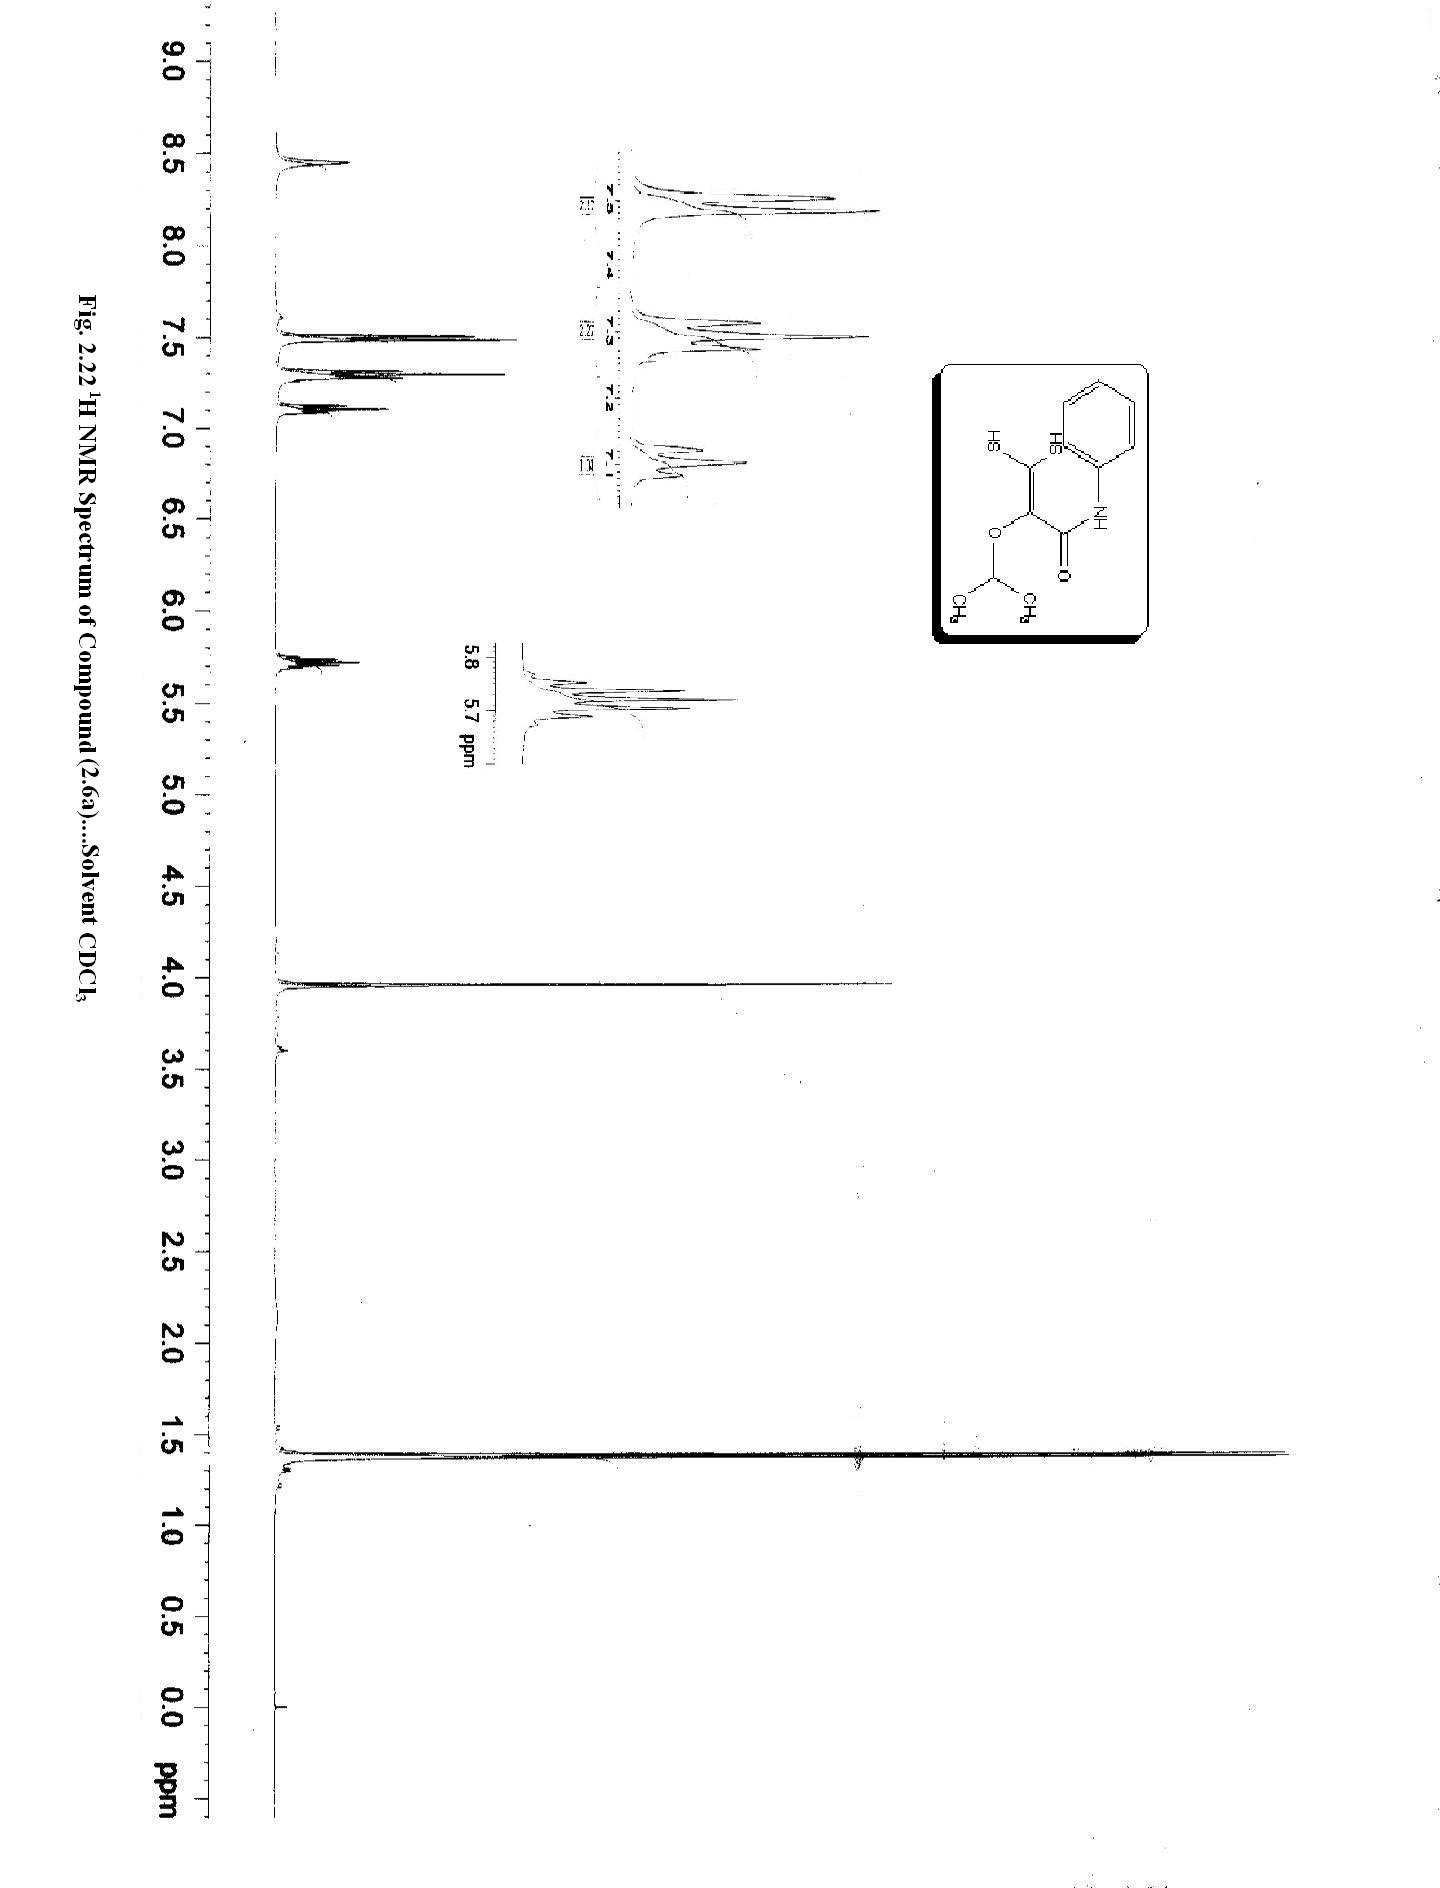


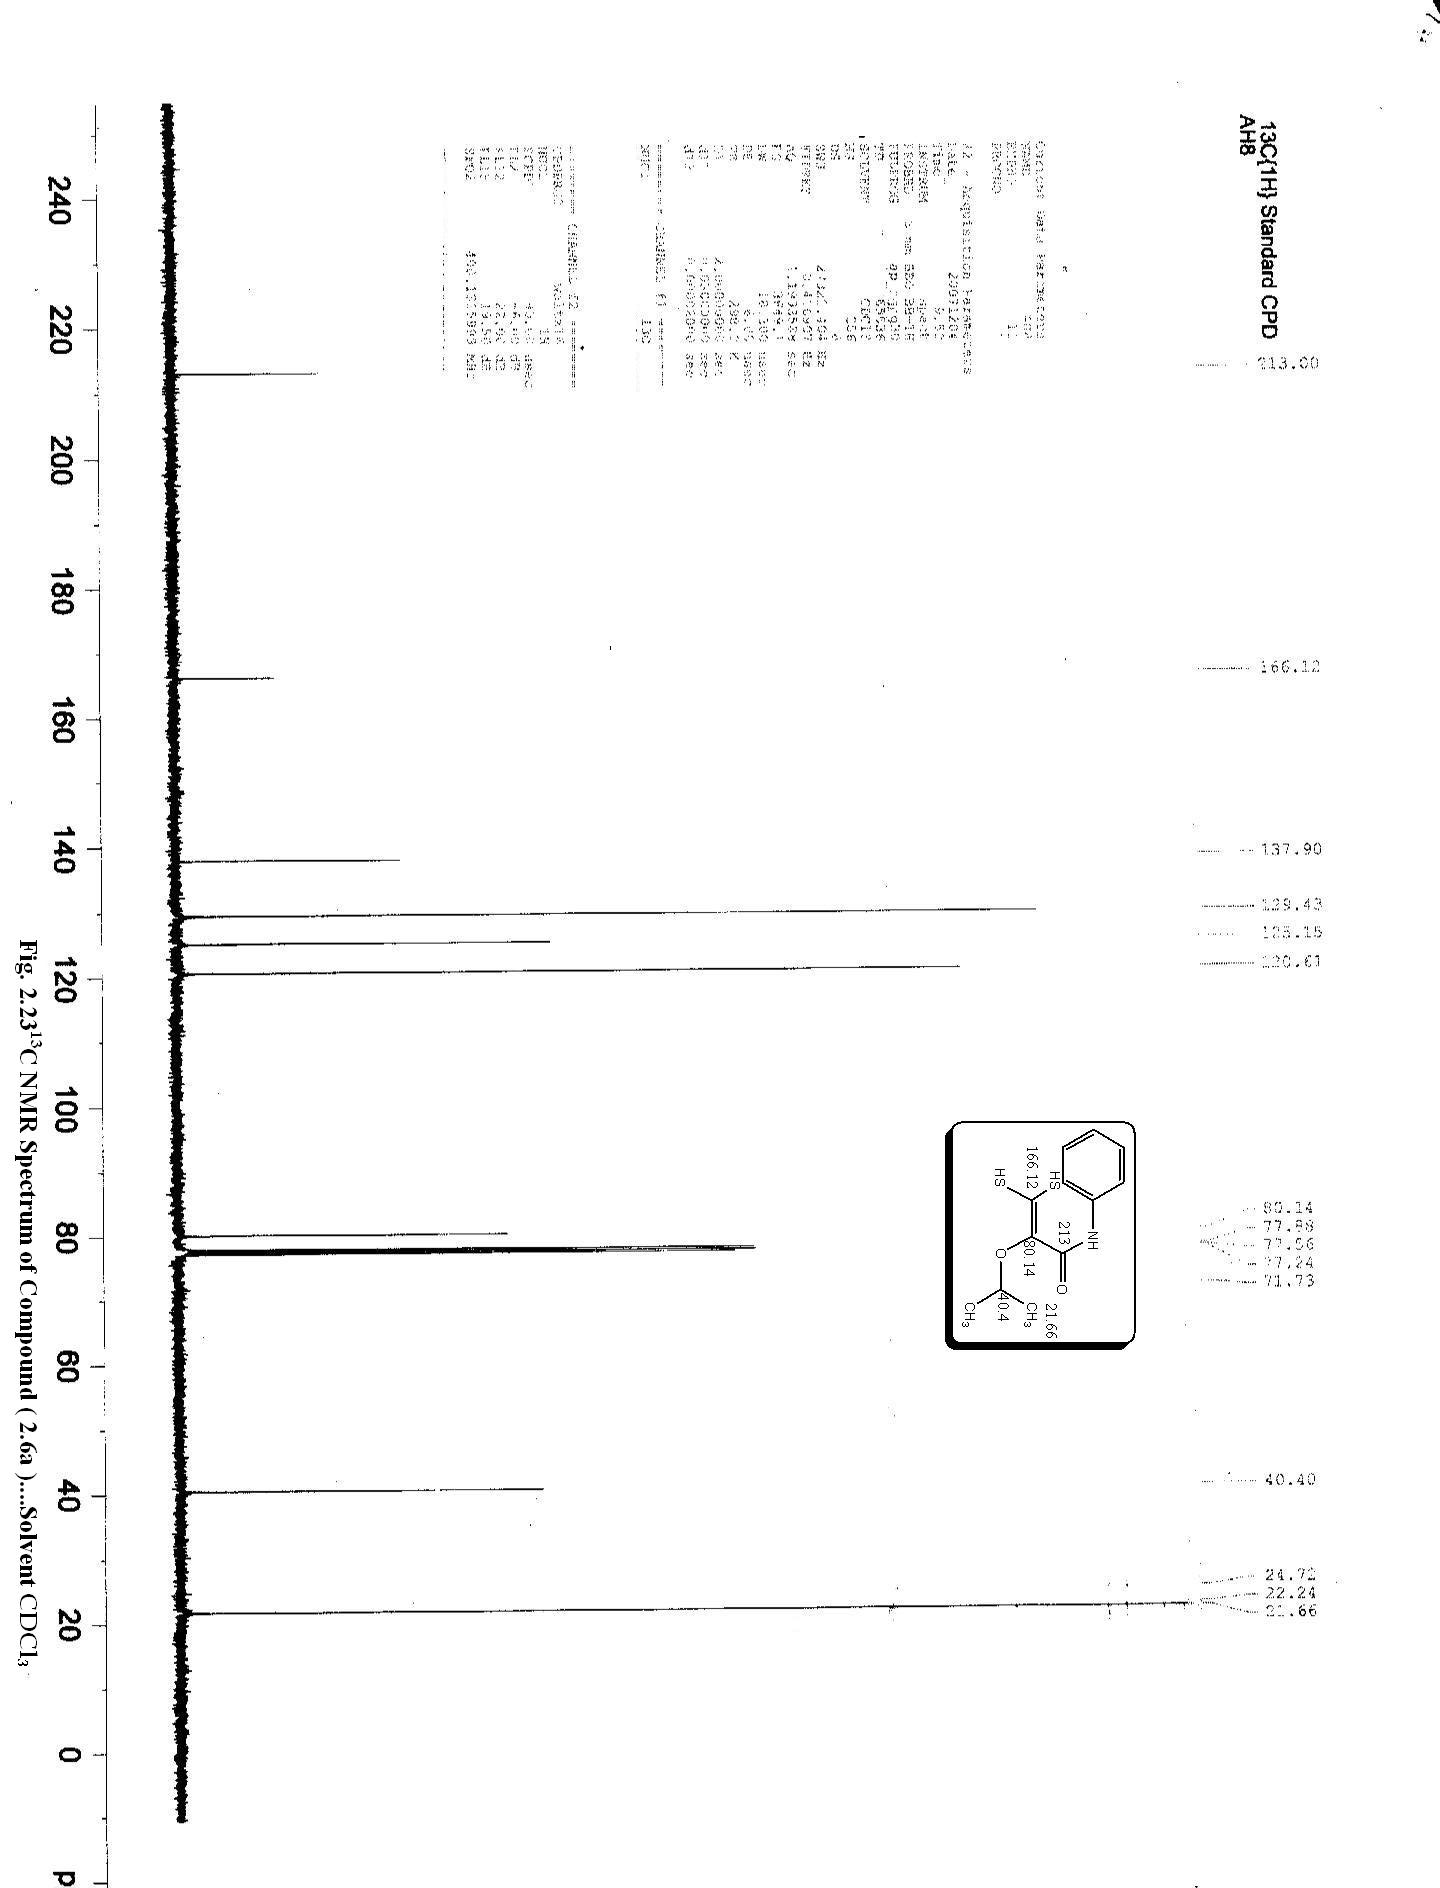


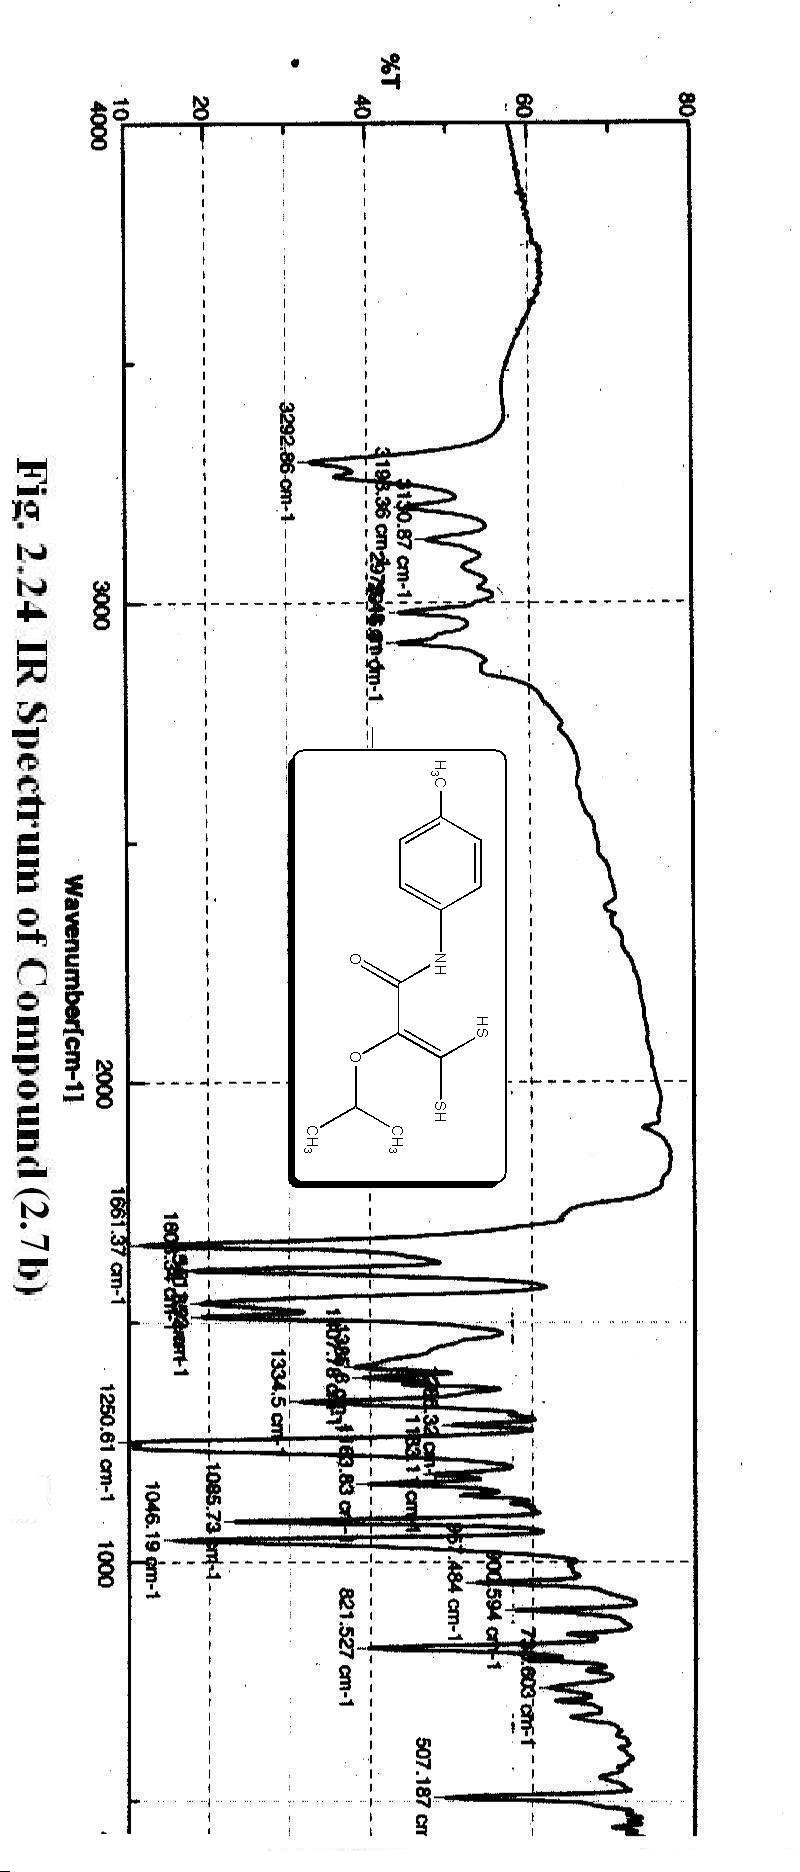


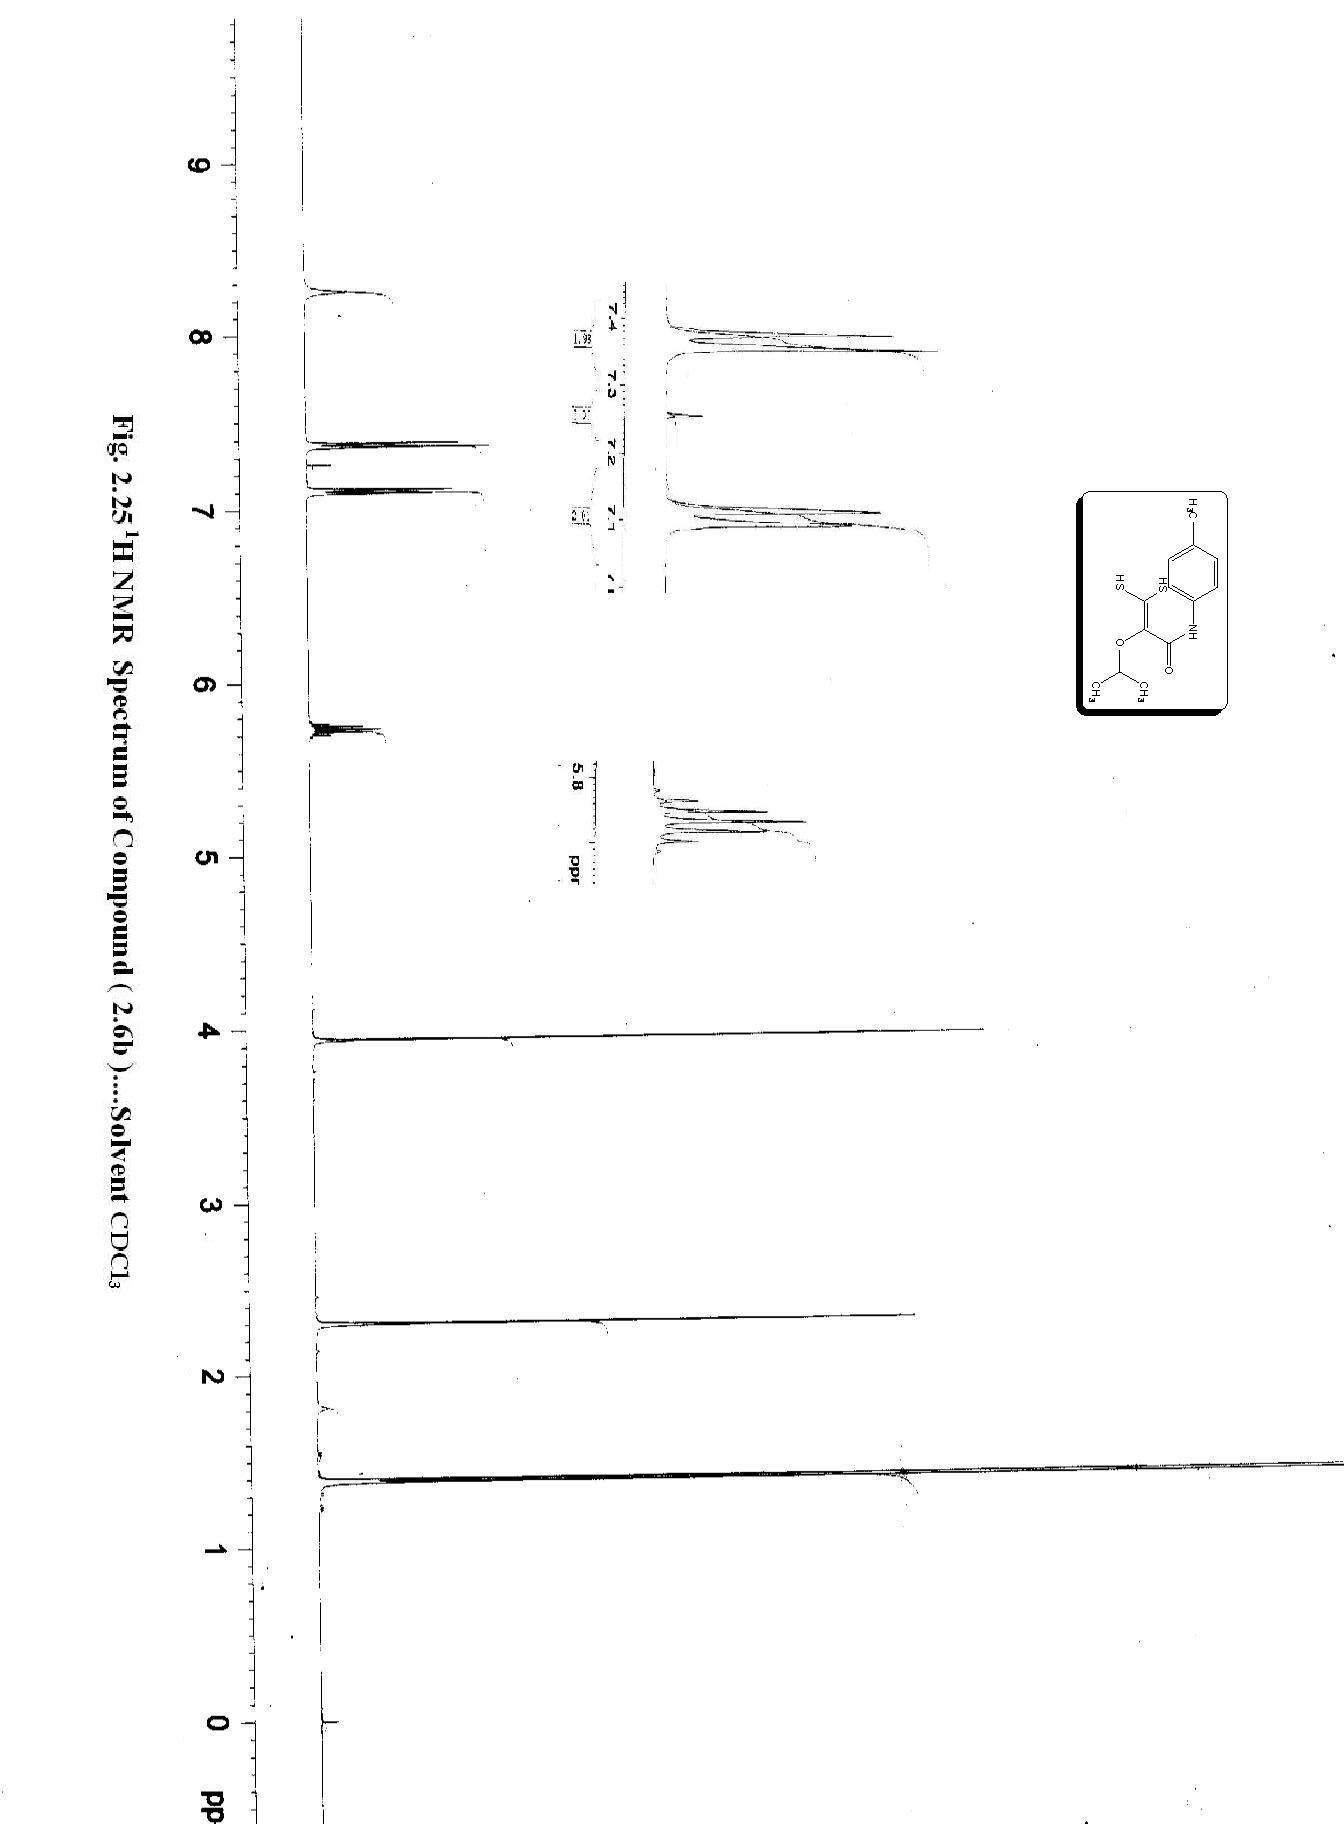


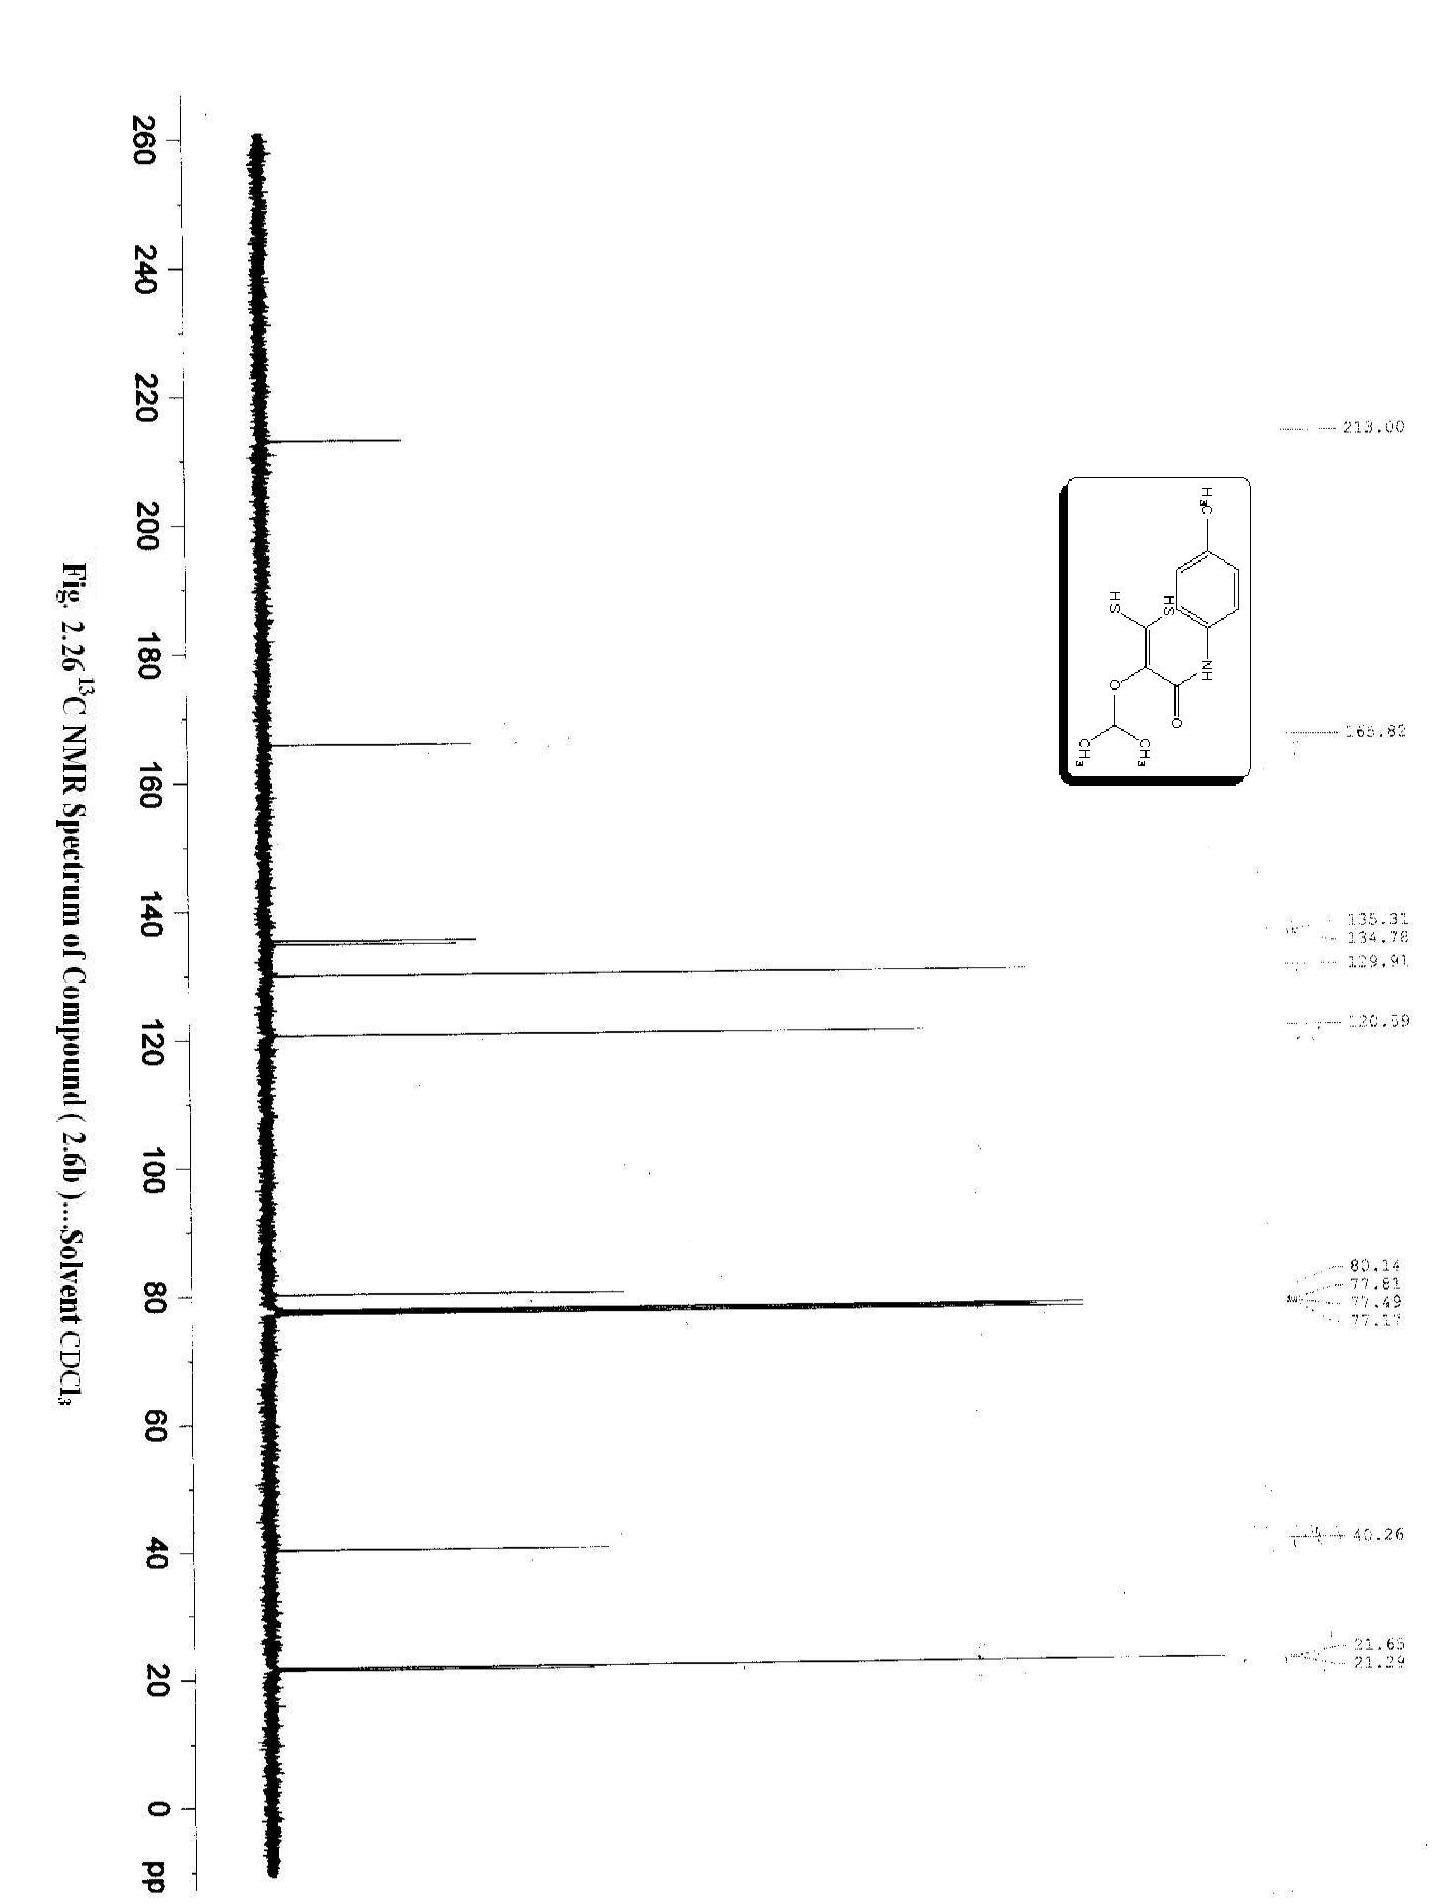


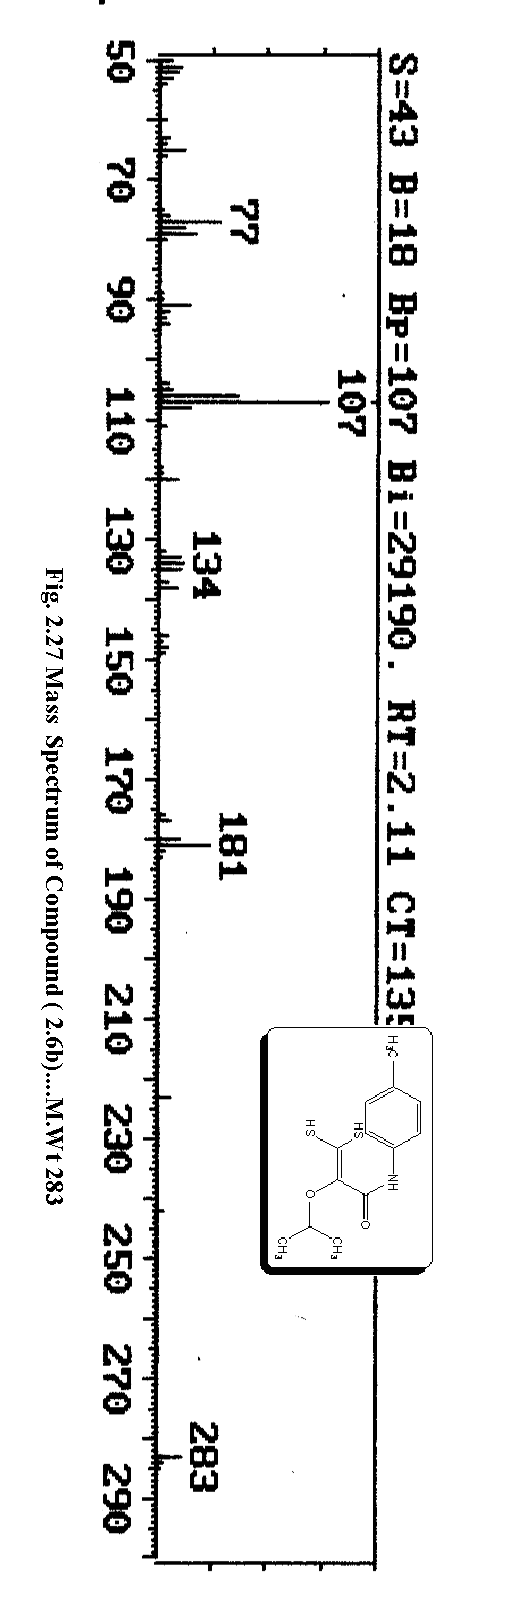


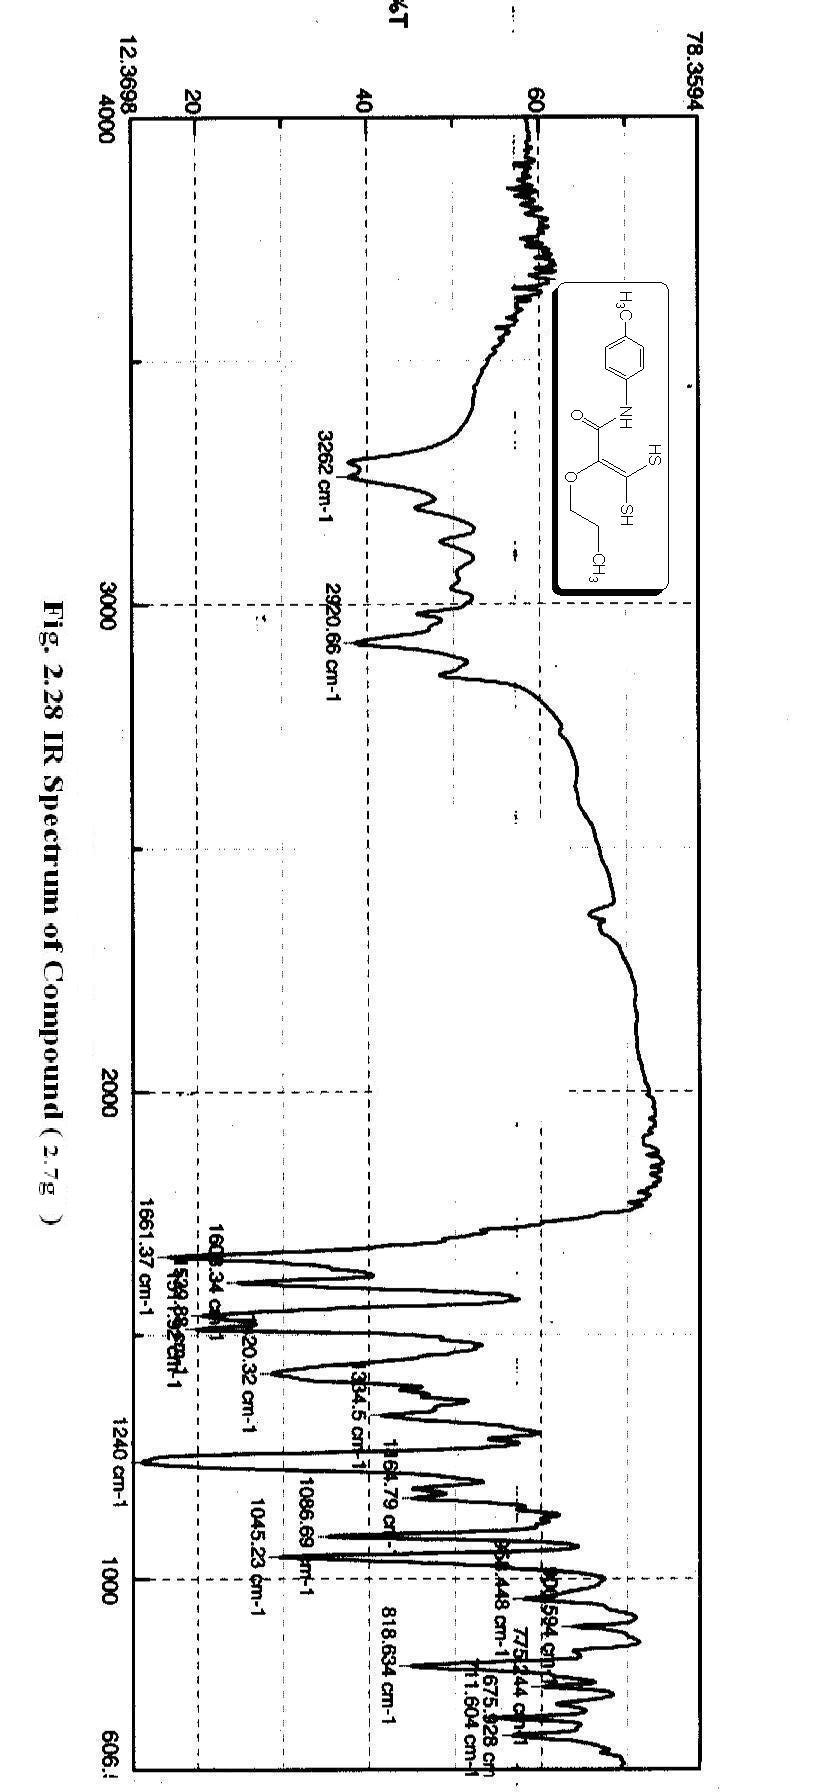


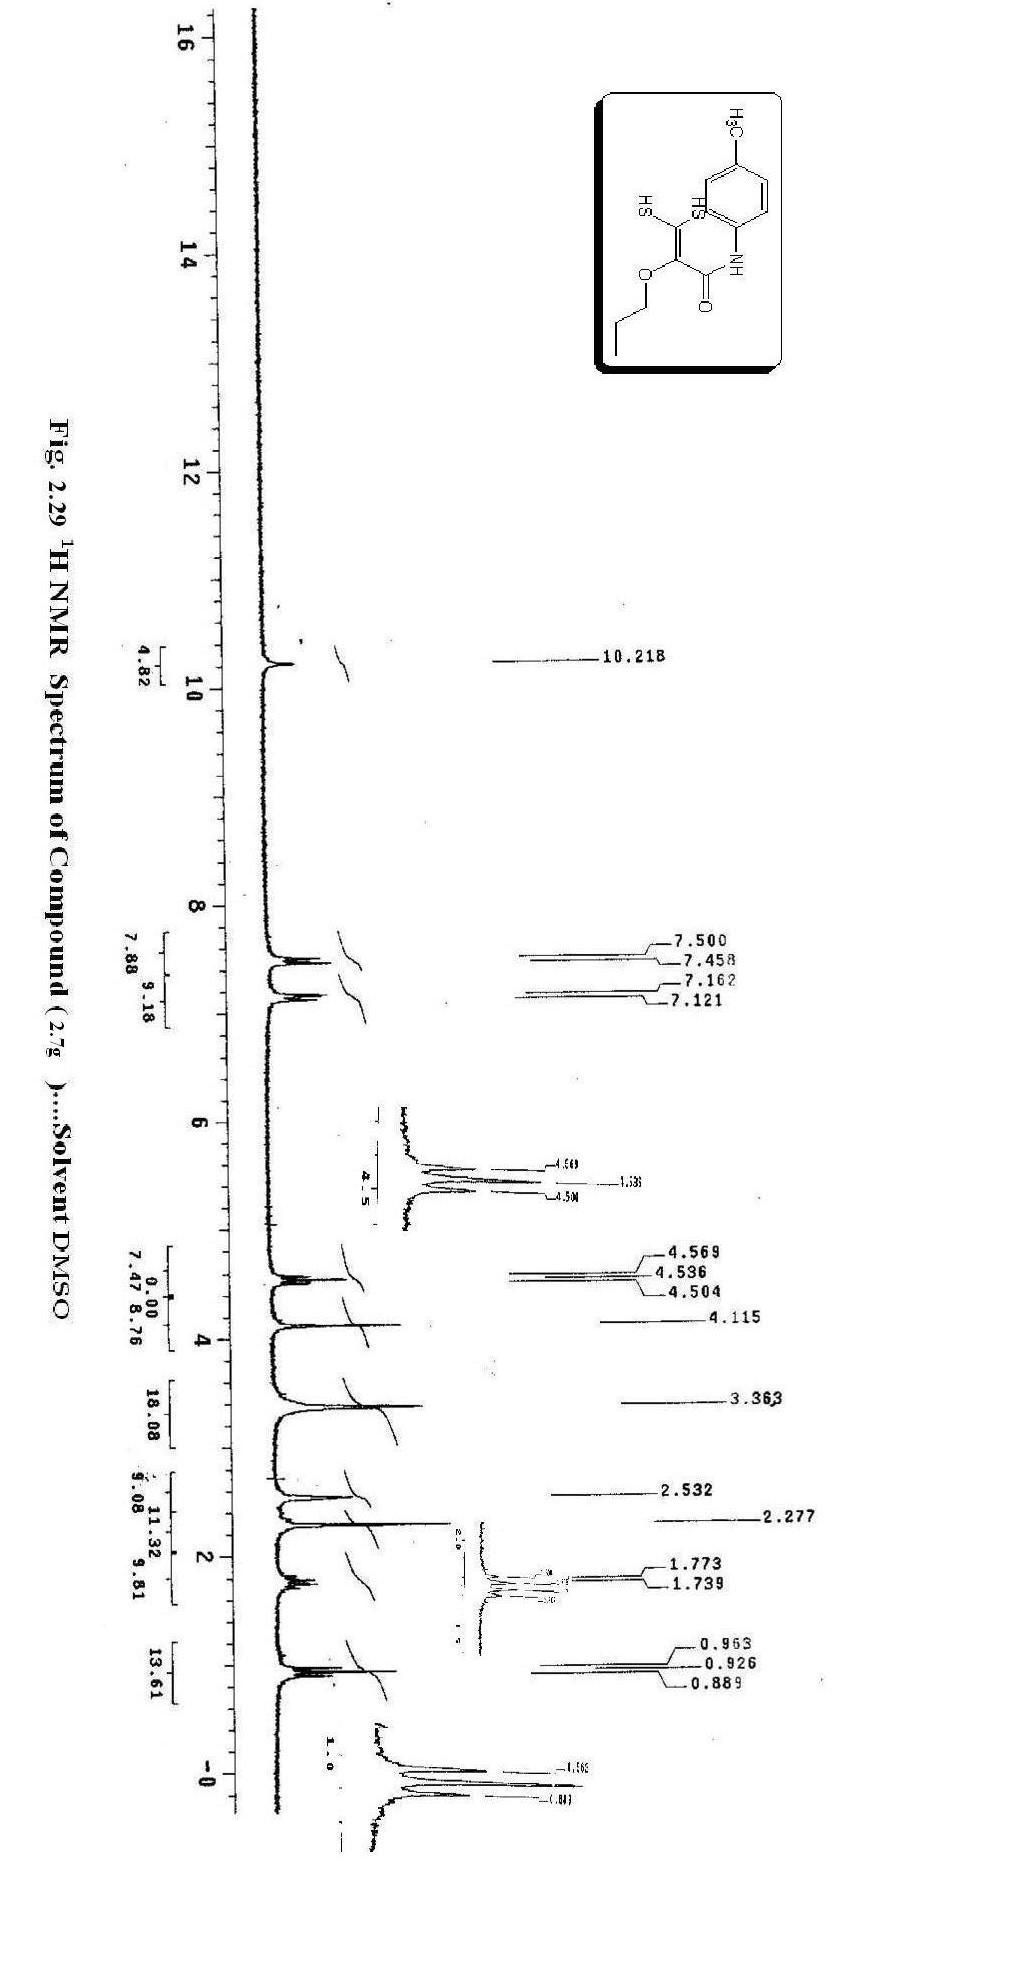


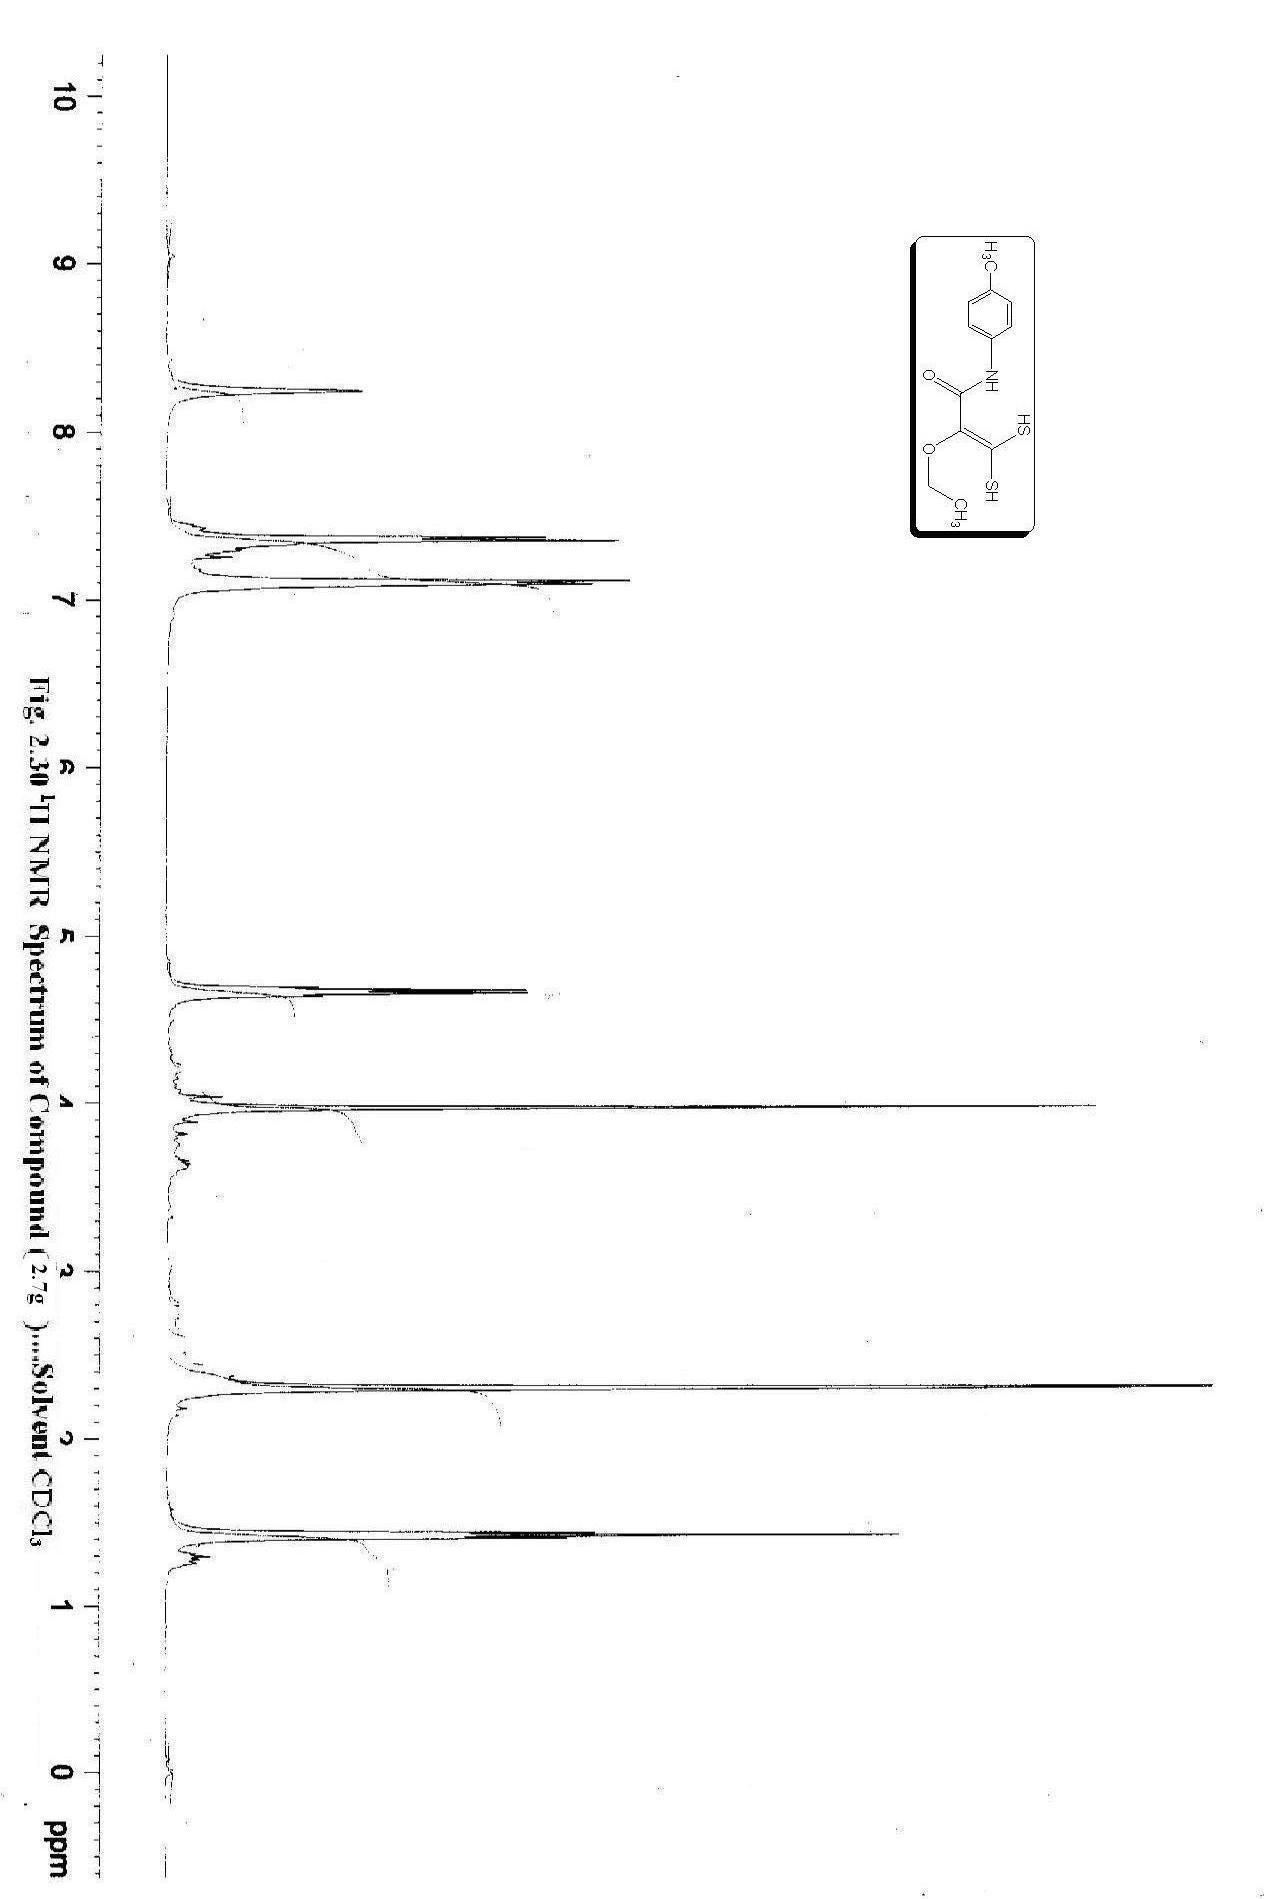


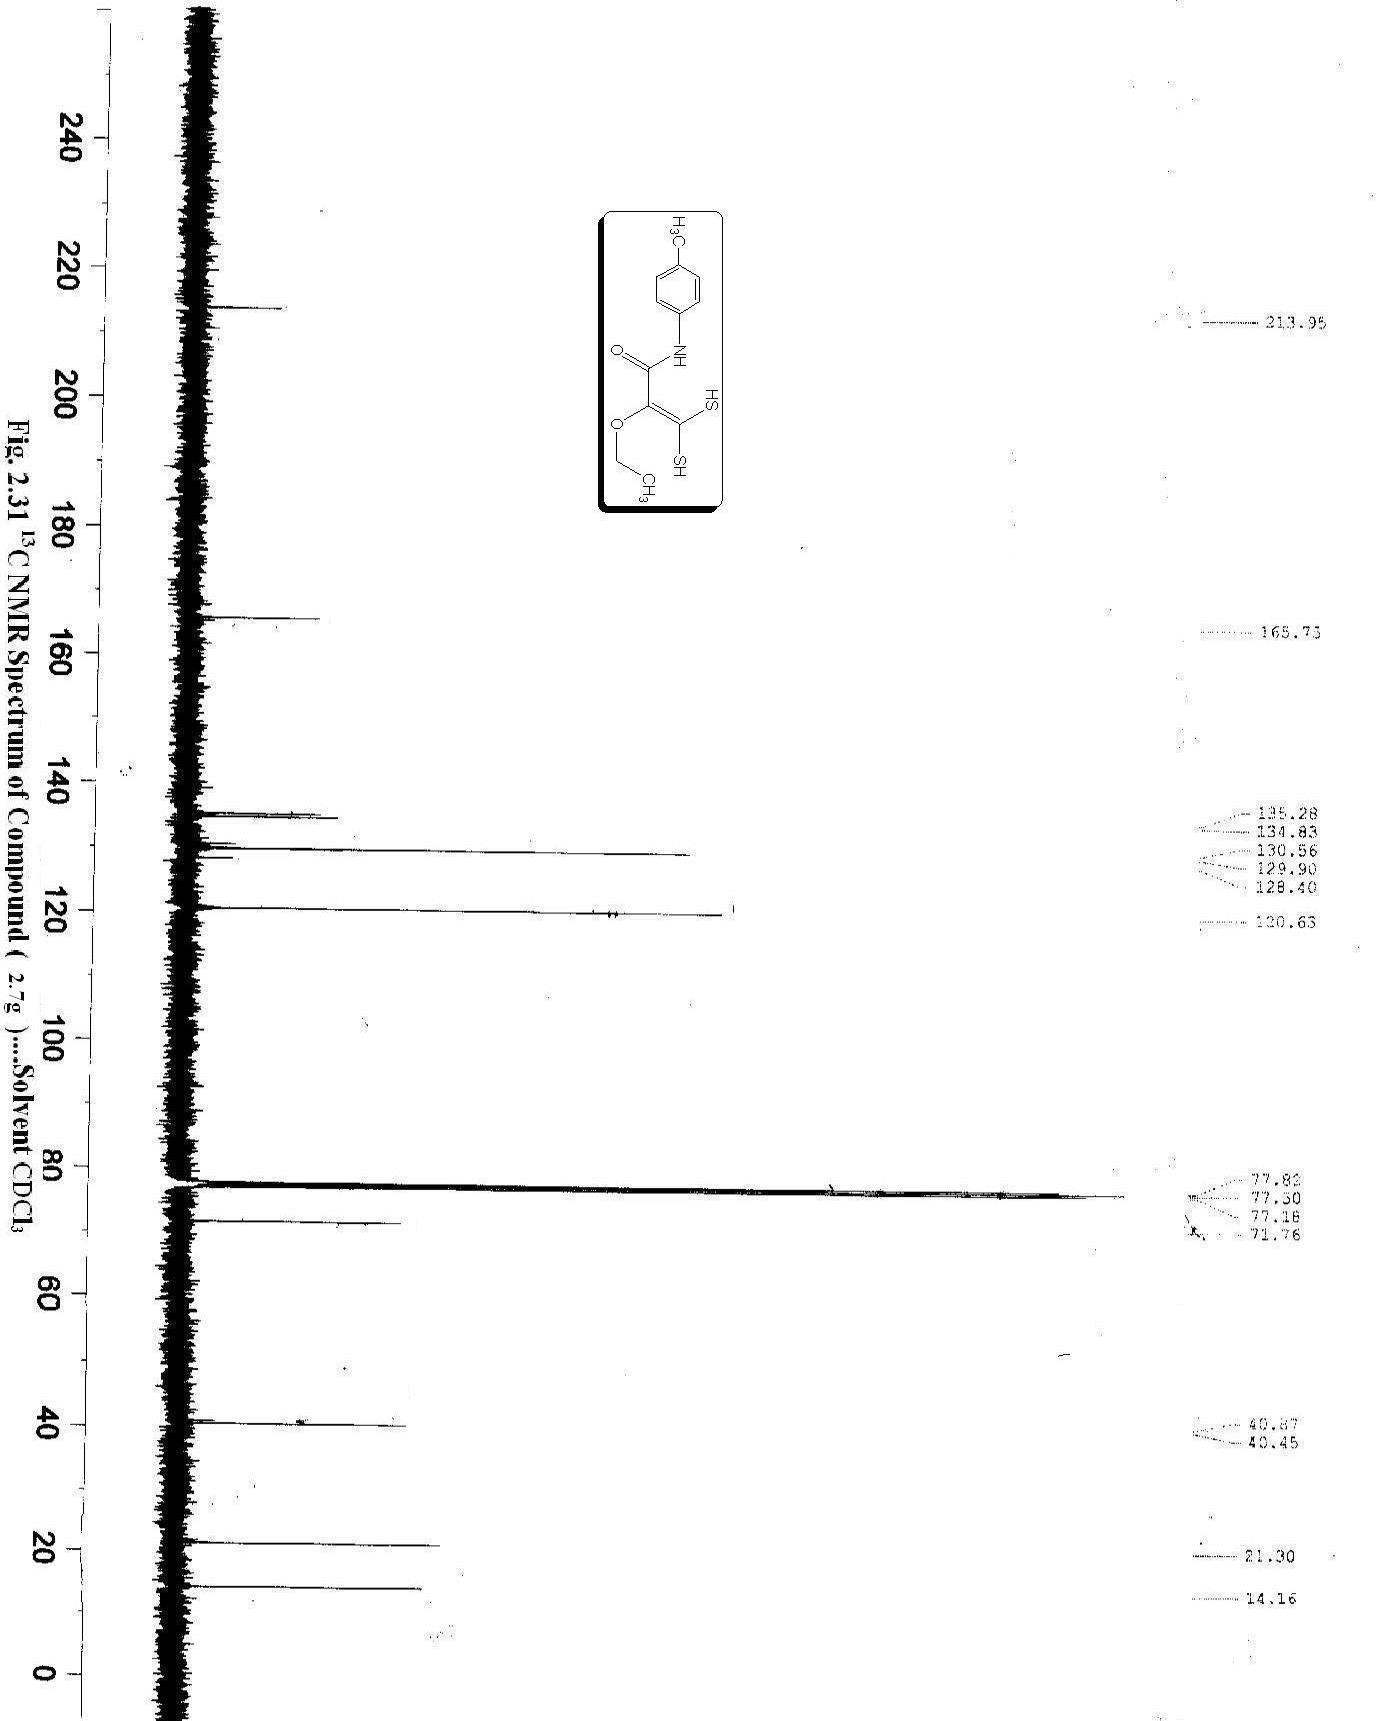


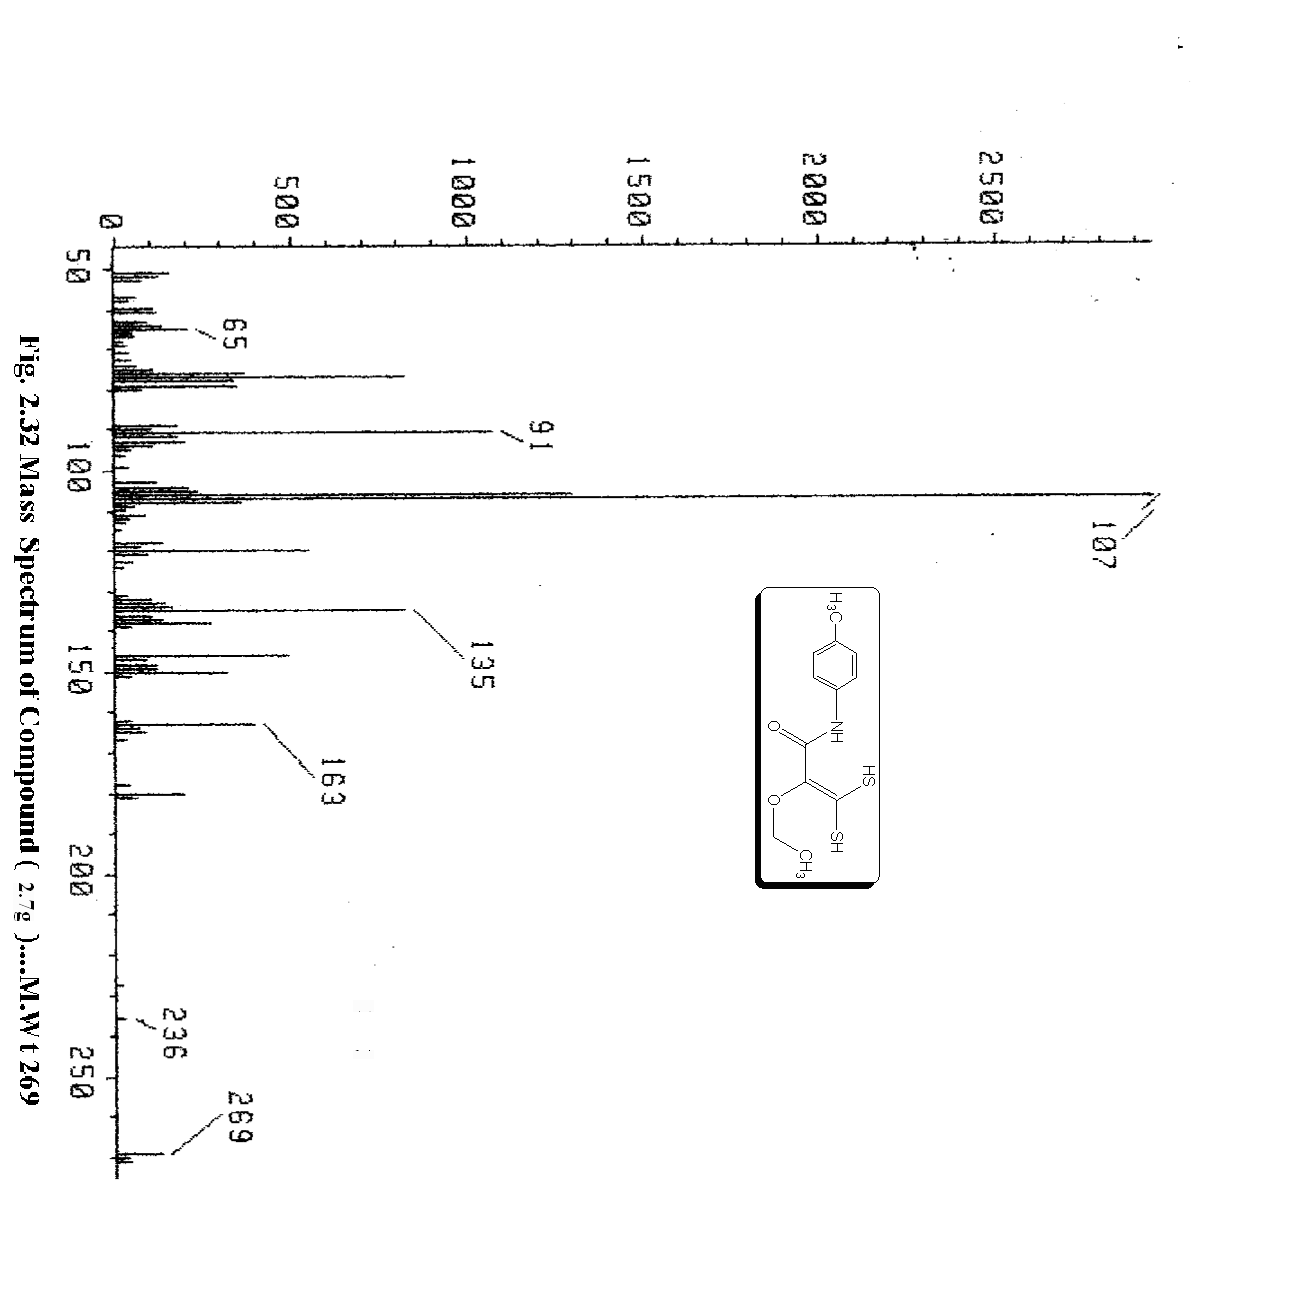

Supplement: Supplementary file 2 [file e3f1c2a2f1b38575ca41d9e0.doc]
